# Supplementary material
Source: publisher figshare collection journal article supplement (https://gsapubs.figshare.com/ndownloader/files/24623942)
Supplement: Supplementary file 1 [file 24623942]

## Sheet: DL-030118-1
DL_030118_1 – Saline Valley Formation - 37.059, -117.87046
Sample Name:								207/235		206/238		207/206		Best age
Grain #	[U] ppm	U/Th	207/235	2σ error	206/238	2σ error	RHO	Age Ma	2σ error	Age (Ma)	2σ error	Age (Ma)	2σ error	(Ma)	2σ error	% Discordance*
DL_030118_1_1	126.6	1.312	4.204	0.062	0.286	0.0036	0.70356	1674	12	1620	18	1744	20	1744	20	7.1
DL_030118_1_2	146.6	2.23	1.875	0.025	0.1796	0.0016	0.32962	1071	8.7	1064.8	8.9	1085	27	1085	27	1.9
DL_030118_1_3	175	1.267	4.543	0.075	0.301	0.0037	0.69871	1737	14	1695	18	1785	22	1785	22	5
DL_030118_1_4	281.1	2.046	4.308	0.053	0.3007	0.0032	0.78688	1693	10	1694	16	1698	14	1698	14	0.2
DL_030118_1_5	134	1.441	2.397	0.033	0.21	0.0022	0.57015	1239.8	9.9	1228	12	1259	23	1259	23	2.5
DL_030118_1_6	286.3	1.507	2.907	0.045	0.2358	0.0038	0.71337	1381	12	1364	20	1412	22	1412	22	3.4
DL_030118_1_7	332	1.882	1.771	0.026	0.1734	0.002	0.73308	1033.4	9.4	1030	11	1038	21	1038	21	0.8
DL_030118_1_8	155.9	2.685	3.154	0.04	0.2538	0.0025	0.45942	1444.5	9.7	1458	13	1426	24	1426	24	2.2
DL_030118_1_9	268	0.956	9.89	0.42	0.397	0.014	0.82428	2420	39	2153	64	2647	39	2647	39	18.7
DL_030118_1_10	104.9	1.431	17.39	0.26	0.5873	0.008	0.75277	2955	14	2976	32	2940	17	2940	17	1.2
DL_030118_1_11	173.3	1.739	4.365	0.062	0.3011	0.0037	0.66364	1703	12	1696	18	1706	20	1706	20	0.6
DL_030118_1_12	302	1.843	2.942	0.043	0.2302	0.003	0.64632	1393	11	1335	16	1478	22	1478	22	9.7
DL_030118_1_13	118.9	1.499	3.06	0.05	0.2451	0.0033	0.62151	1421	12	1413	17	1426	25	1426	25	0.9
DL_030118_1_14	122.2	0.2571	3.085	0.054	0.2437	0.0031	0.58642	1425	14	1405	16	1446	28	1446	28	2.8
DL_030118_1_15	341.7	4.83	7.88	0.12	0.4043	0.0047	0.77843	2216	13	2188	22	2238	17	2238	17	2.2
DL_030118_1_16	479	1.856	1.846	0.02	0.178	0.0016	0.66113	1062.9	7.7	1055.9	8.6	1069	18	1069	18	1.2
DL_030118_1_17	169.7	2.067	4.38	0.054	0.3003	0.0032	0.59352	1706	10	1692	16	1722	19	1722	19	1.7
DL_030118_1_18	275.1	2.157	4.417	0.052	0.3	0.0033	0.79841	1714	9.7	1690	16	1736	14	1736	14	2.6
DL_030118_1_19	195	1.198	13.82	0.18	0.5271	0.0065	0.69921	2735	12	2727	28	2737	16	2737	16	0.4
DL_030118_1_20	95	1.169	1.916	0.031	0.1834	0.0021	0.39131	1084	11	1085	11	1067	33	1067	33	1.7
DL_030118_1_21	120.1	1.237	2.071	0.044	0.1939	0.0032	0.72236	1135	15	1144	17	1118	29	1118	29	2.3
DL_030118_1_22	287.2	1.177	3.106	0.048	0.2485	0.0036	0.73351	1432	12	1430	18	1427	20	1427	20	0.2
DL_030118_1_23	325	0.8591	12.9	0.15	0.5145	0.0062	0.80532	2671	11	2678	27	2669	12	2669	12	0.3
DL_030118_1_24	142.1	1.105	12.1	0.21	0.5159	0.0072	0.69616	2607	16	2683	32	2544	21	2544	21	5.5
DL_030118_1_25	284.6	2.697	4.251	0.054	0.2979	0.0032	0.6803	1682	10	1680	16	1673	17	1673	17	0.4
DL_030118_1_26	236.8	2.277	4.589	0.06	0.3135	0.0039	0.74896	1747	11	1760	18	1730	18	1730	18	1.7
DL_030118_1_27	209.3	0.5653	15.15	0.23	0.5454	0.0074	0.80842	2822	15	2804	31	2830	15	2830	15	0.9
DL_030118_1_28	333	1.794	4.129	0.048	0.2892	0.0035	0.78222	1658.4	9.5	1639	18	1677	14	1677	14	2.3
DL_030118_1_29	56.3	1.027	3.074	0.058	0.2433	0.0036	0.52875	1422	14	1403	19	1444	31	1444	31	2.8
DL_030118_1_30	181.7	1.944	4.558	0.067	0.3115	0.0044	0.71097	1739	12	1747	22	1727	20	1727	20	1.2
DL_030118_1_31	329	1.654	4.616	0.04	0.31	0.0025	0.65804	1751.3	7.2	1740	12	1759	13	1759	13	1.1
DL_030118_1_32	205.4	0.96	3.11	0.036	0.2471	0.0023	0.61565	1433.6	8.8	1423	12	1440	18	1440	18	1.2
DL_030118_1_33	172.9	0.7241	16.01	0.19	0.562	0.0061	0.74194	2875	11	2876	26	2872	13	2872	13	0.1
DL_030118_1_34	214.4	2.014	4.82	0.058	0.3208	0.0039	0.77368	1786	10	1792	19	1777	16	1777	16	0.8
DL_030118_1_35	113.1	0.3734	12.23	0.15	0.489	0.0062	0.74459	2621	11	2564	27	2661	15	2661	15	3.6
DL_030118_1_36	242.1	1.538	3.154	0.048	0.2543	0.004	0.75589	1443	12	1459	21	1422	19	1422	19	2.6
DL_030118_1_37	121.7	1.174	5.274	0.079	0.3482	0.005	0.7404	1863	13	1924	24	1794	20	1794	20	7.2
DL_030118_1_38	80.5	0.829	2.162	0.042	0.1924	0.0025	0.58869	1168	14	1134	14	1224	33	1224	33	7.4
DL_030118_1_39	209.4	1.085	3.153	0.055	0.2542	0.004	0.67287	1443	13	1459	21	1418	26	1418	26	2.9
DL_030118_1_40	222.4	1.185	3.241	0.048	0.2565	0.0031	0.7041	1466	12	1471	16	1462	20	1462	20	0.6
DL_030118_1_41	231.6	1.343	1.918	0.033	0.1841	0.0025	0.77724	1088	11	1089	14	1087	21	1087	21	0.2
DL_030118_1_42	184.5	2.03	3.089	0.04	0.2463	0.0027	0.65111	1429.4	9.8	1419	14	1441	19	1441	19	1.5
DL_030118_1_43	153.9	1.468	4.232	0.064	0.298	0.0039	0.72381	1679	12	1683	19	1674	20	1674	20	0.5
DL_030118_1_44	146.3	1.329	1.995	0.032	0.1887	0.0022	0.56715	1112	11	1114	12	1109	26	1109	26	0.5
DL_030118_1_45	378.6	2.63	1.849	0.025	0.1812	0.0022	0.72801	1061.7	8.8	1073	12	1042	19	1042	19	3
DL_030118_1_46	94.6	1.73	4.78	0.082	0.3191	0.0049	0.69405	1778	14	1783	24	1774	23	1774	23	0.5
DL_030118_1_47	107.1	0.424	2.612	0.062	0.2208	0.0045	0.39332	1301	18	1286	24	1317	48	1317	48	2.4
DL_030118_1_48	149.9	1.494	4.187	0.08	0.2921	0.0055	0.79202	1668	16	1650	28	1687	23	1687	23	2.2
DL_030118_1_49	75.6	2.75	4.274	0.067	0.2974	0.004	0.65201	1687	13	1677	20	1706	22	1706	22	1.7
DL_030118_1_50	279	1.735	3.08	0.037	0.2439	0.0029	0.70485	1426	9.2	1406	15	1459	17	1459	17	3.6
DL_030118_1_51	289	1.176	2.84	0.03	0.225	0.0018	0.60114	1366	8.1	1307.9	9.2	1451	17	1451	17	9.9
DL_030118_1_52	375	3.04	4.201	0.06	0.29	0.0041	0.71851	1672	12	1640	21	1718	20	1718	20	4.5
DL_030118_1_53	196.5	0.876	2.976	0.052	0.2352	0.0036	0.63667	1399	13	1361	19	1465	26	1465	26	7.1
DL_030118_1_54	456	0.763	3.515	0.094	0.2447	0.0068	0.82435	1528	21	1419	39	1670	31	1670	31	15
DL_030118_1_55	326	0.943	2.573	0.049	0.2074	0.0035	0.77168	1290	13	1214	19	1416	23	1416	23	14.3
DL_030118_1_56	464	1.565	3.173	0.075	0.2192	0.0044	0.79552	1447	19	1277	23	1700	23	1700	23	24.9
DL_030118_1_57	274	2.36	5.06	0.16	0.3199	0.0088	0.67167	1824	27	1787	43	1867	45	1867	45	4.3
DL_030118_1_58	209.2	0.792	4.04	0.11	0.2817	0.0074	0.59298	1638	22	1598	37	1690	36	1690	36	5.4
DL_030118_1_59	134.9	1.681	4.08	0.11	0.279	0.0065	0.71754	1646	23	1585	33	1726	36	1726	36	8.2
DL_030118_1_60	189	1.566	2.924	0.069	0.2284	0.0045	0.69344	1385	18	1325	23	1476	34	1476	34	10.2
DL_030118_1_61	166.7	1.163	4.07	0.05	0.281	0.003	0.72445	1646	10	1596	15	1709	16	1709	16	6.6
DL_030118_1_62	459	6.09	4.451	0.068	0.2994	0.0041	0.83411	1719	13	1687	20	1757	16	1757	16	4
DL_030118_1_63	194.9	1.06	3.03	0.069	0.2381	0.0044	0.69644	1412	17	1376	23	1463	32	1463	32	5.9
DL_030118_1_64	240.8	0.846	11.82	0.19	0.4668	0.0072	0.75212	2586	15	2471	31	2683	17	2683	17	7.9
DL_030118_1_65	309	2.146	4.159	0.045	0.2854	0.0032	0.75871	1664.5	9	1618	16	1717	14	1717	14	5.8
DL_030118_1_66	225	1.052	11.48	0.15	0.4739	0.0061	0.80339	2560	12	2499	27	2599	13	2599	13	3.8
DL_030118_1_67	164	1.055	3.332	0.055	0.2412	0.0028	0.78833	1486	13	1392	14	1615	19	1615	19	13.8
DL_030118_1_68	586	2.306	3.084	0.068	0.216	0.0047	0.90616	1425	17	1260	25	1679	18	1679	18	25
DL_030118_1_69	599	0.87	2.428	0.038	0.1946	0.0028	0.85639	1250	11	1146	15	1428	16	1428	16	19.7
DL_030118_1_70	264.5	1.478	1.899	0.026	0.1751	0.0017	0.61681	1079.8	9.2	1040.1	9.4	1156	22	1156	22	10
DL_030118_1_71	470	2.07	10.38	0.24	0.406	0.011	0.93873	2473	24	2192	49	2723	19	2723	19	19.5
DL_030118_1_72	386	1.326	3.99	0.11	0.2702	0.0069	0.76683	1629	22	1540	35	1729	30	1729	30	10.9
DL_030118_1_73	548	2.276	4.156	0.079	0.2927	0.005	0.7781	1663	16	1654	25	1672	23	1672	23	1.1
DL_030118_1_74	306	0.724	3.556	0.095	0.2548	0.0073	0.80089	1541	22	1462	38	1623	37	1623	37	9.9
DL_030118_1_75	193	0.61	4.04	0.093	0.2759	0.0077	0.83025	1639	19	1568	39	1732	31	1732	31	9.5
DL_030118_1_76	248.9	1.866	4.144	0.088	0.2839	0.0059	0.81838	1659	17	1609	29	1721	22
DL_030118_1_77	233.8	0.915	4.293	0.069	0.2974	0.0047	0.7932	1691	13	1677	23	1705	20	1705	20	1.6
DL_030118_1_78	243	1.758	4.074	0.051	0.2811	0.0034	0.75177	1647	10	1596	17	1711	16	1711	16	6.7
DL_030118_1_79	222	1.34	3.4	0.23	0.24	0.016	0.77686	1493	55	1382	83	1677	55	1677	55	17.6
DL_030118_1_80	289	1.91	3.93	0.14	0.2668	0.0079	0.84896	1614	30	1523	40	1732	37	1732	37	12.1
DL_030118_1_81	236.6	1.332	2.771	0.047	0.2272	0.0037	0.75389	1346	12	1319	20	1389	23	1389	23	5
DL_030118_1_82	282	1.821	4.178	0.07	0.2861	0.0043	0.70995	1667	14	1621	21	1722	26	1722	26	5.9
DL_030118_1_83	337	4.92	3.897	0.07	0.2712	0.0044	0.68573	1612	15	1546	22	1702	23	1702	23	9.2
DL_030118_1_84	605	1.069	2.96	0.1	0.2392	0.0072	0.7615	1395	26	1381	37	1409	46	1409	46	2
DL_030118_1_85	355	1.69	3.69	0.15	0.256	0.01	0.84717	1570	30	1467	52	1695	42	1695	42	13.5
DL_030118_1_86	181.3	1.937	4.275	0.057	0.2939	0.0032	0.64365	1688	11	1661	16	1719	19	1719	19	3.4
DL_030118_1_87	192.1	0.667	2.972	0.093	0.2275	0.0058	0.77358	1400	25	1320	30	1520	36	1520	36	13.2
DL_030118_1_88	108.4	1.084	3.173	0.046	0.2552	0.0031	0.53594	1448	11	1465	16	1425	21	1425	21	2.8
DL_030118_1_89	426	1.443	3.954	0.083	0.2712	0.0054	0.86102	1623	17	1546	28	1699	23	1699	23	9
DL_030118_1_90	212.5	1.383	3.98	0.06	0.2715	0.0039	0.75661	1630	13	1550	20	1731	19	1731	19	10.5
DL_030118_1_91	413	6.29	1.764	0.022	0.1658	0.002	0.75967	1032.1	8.2	988	11	1124	17	1124	17	12.1
DL_030118_1_92	305	1.224	2.998	0.051	0.2415	0.0039	0.79055	1405	13	1393	20	1425	21	1425	21	2.2
DL_030118_1_93	274.5	1.003	4.068	0.037	0.2772	0.0022	0.7182	1647.9	7.5	1577	11	1738	12	1738	12	9.3
DL_030118_1_94	206.6	0.966	4.366	0.056	0.2954	0.0033	0.71837	1704	11	1668	16	1752	16	1752	16	4.8
DL_030118_1_95	586	6.8	1.832	0.026	0.1762	0.0021	0.76169	1055.5	9.6	1046	12	1079	19	1079	19	3.1
DL_030118_1_96	392	1.961	3.246	0.036	0.2294	0.0025	0.77694	1467.3	8.7	1331	13	1662	14	1662	14	19.9
DL_030118_1_97	263.5	2.43	4.137	0.071	0.2912	0.0047	0.77902	1659	14	1646	23	1685	20	1685	20	2.3
DL_030118_1_98	213.4	1.629	2.848	0.056	0.2249	0.004	0.76683	1368	16	1307	21	1454	24	1454	24	10.1
DL_030118_1_99	216.8	2.385	3.066	0.04	0.2479	0.0028	0.66966	1422	10	1427	14	1419	19	1419	19	0.6
DL_030118_1_100	128.5	1.321	4.297	0.067	0.3	0.004	0.72499	1691	13	1690	20	1699	21	1699	21	0.5
DL_030118_1_101	231.4	1.394	3.707	0.054	0.2648	0.004	0.7734	1572	12	1513	20	1656	18	1656	18	8.6
DL_030118_1_102	201.4	1.087	3.059	0.04	0.2457	0.0027	0.75555	1420	10	1416	14	1430	16	1430	16	1
DL_030118_1_103	293	3.146	4.326	0.064	0.3016	0.004	0.78459	1696	12	1698	20	1695	18	1695	18	0.2
DL_030118_1_104	207.8	1.509	4.027	0.061	0.2812	0.0036	0.71679	1637	12	1596	18	1694	20	1694	20	5.8
DL_030118_1_105	72.6	0.973	4.071	0.06	0.2885	0.0035	0.70106	1647	12	1633	17	1670	19	1670	19	2.2
DL_030118_1_106	183.5	2.088	4.08	0.054	0.2852	0.0031	0.68491	1648	11	1617	15	1690	18	1690	18	4.3
DL_030118_1_107	174.7	1.483	1.857	0.025	0.1775	0.002	0.62277	1064.5	9.1	1053	11	1091	22	1091	22	3.5
DL_030118_1_108	372	1.201	2.772	0.031	0.2213	0.0021	0.72228	1346.6	8.3	1289	11	1438	15	1438	15	10.4
DL_030118_1_109	65.8	0.666	3.987	0.054	0.2701	0.0027	0.4699	1631	11	1541	14	1752	23	1752	23	12
DL_030118_1_110	187.1	0.5277	4.169	0.057	0.2915	0.0037	0.68751	1667	11	1648	18	1690	20	1690	20	2.5
DL_030118_1_111	136.9	0.924	3.072	0.047	0.2508	0.0033	0.75973	1423	12	1442	17	1398	19	1398	19	3.1
DL_030118_1_112	283	1.642	1.912	0.029	0.1829	0.0025	0.78345	1083	10	1082	14	1085	19	1085	19	0.3
DL_030118_1_113	246	2.133	3.003	0.049	0.2398	0.0034	0.7693	1406	12	1385	17	1437	20	1437	20	3.6
DL_030118_1_114	266	1.041	2.609	0.036	0.206	0.0024	0.73471	1303	10	1207	13	1459	18	1459	18	17.3
DL_030118_1_115	260.3	1.86	4.658	0.06	0.3081	0.0036	0.76555	1757	11	1730	18	1792	15	1792	15	3.5
DL_030118_1_116	147.6	0.891	4.18	0.064	0.291	0.0041	0.69755	1667	13	1645	21	1693	21	1693	21	2.8
DL_030118_1_117	487	3.85	4.504	0.053	0.304	0.0033	0.81975	1730	9.9	1710	16	1755	13	1755	13	2.6
DL_030118_1_118	324	3.179	2.994	0.046	0.239	0.003	0.75208	1404	12	1383	16	1434	19	1434	19	3.6
DL_030118_1_119	106.7	1.745	5.04	0.14	0.3132	0.0047	0.61845	1817	22	1755	24	1890	36	1890	36	7.1
DL_030118_1_120	373	1.018	1.869	0.022	0.1759	0.002	0.69636	1069	8.1	1044	11	1115	18	1115	18	6.4
DL_030118_1_121	209.9	0.3892	2.764	0.051	0.2203	0.0036	0.83065	1343	14	1282	19	1433	24	1433	24	10.5
DL_030118_1_122	166.2	1.522	3.02	0.038	0.2373	0.0026	0.6538	1412.2	9.5	1372	14	1474	20	1474	20	6.9
DL_030118_1_123	135.2	0.517	2.983	0.044	0.2347	0.0027	0.58251	1401	11	1359	14	1466	23	1466	23	7.3
DL_030118_1_124	289	3.97	1.599	0.019	0.1481	0.0016	0.74321	968.9	7.3	890.3	9	1146	21	1146	21	22.3
DL_030118_1_125	384.7	1.155	3.283	0.052	0.2294	0.0035	0.83936	1474	12	1330	18	1686	16	1686	16	21.1
DL_030118_1_126	197.4	1.488	4.093	0.057	0.2855	0.0038	0.79742	1652	12	1618	19	1691	16	1691	16	4.3
DL_030118_1_127	323	0.7083	11.17	0.14	0.4631	0.0052	0.77122	2535	12	2452	23	2601	14	2601	14	5.7
DL_030118_1_128	201.8	4.36	4.182	0.047	0.2892	0.0028	0.71505	1668.8	9.3	1637	14	1709	15	1709	15	4.2
DL_030118_1_129	167.8	1.514	4.219	0.053	0.29	0.0032	0.65856	1676	10	1641	16	1714	18	1714	18	4.3
DL_030118_1_130	280	0.824	2.642	0.034	0.2204	0.0024	0.70782	1310.8	9.6	1283	13	1351	18	1351	18	5
DL_030118_1_131	292	5.18	4.5	0.053	0.2978	0.0032	0.74912	1729.3	9.7	1680	16	1786	14	1786	14	5.9
DL_030118_1_132	510	5.41	1.764	0.022	0.1694	0.002	0.78462	1032.2	7.9	1008	11	1079	16	1079	16	6.6
DL_030118_1_133	132.1	1.155	4.291	0.058	0.2924	0.0033	0.69947	1691	11	1653	17	1733	18	1733	18	4.6
DL_030118_1_134	138.4	1.087	1.882	0.026	0.1728	0.0019	0.4873	1074.1	9.6	1027	10	1162	26	1162	26	11.6
DL_030118_1_135	271	2.819	3.008	0.032	0.2433	0.0026	0.67082	1408.4	8.2	1403	14	1414	17	1414	17	0.8
DL_030118_1_136	222.4	1.528	4.223	0.079	0.2773	0.0047	0.79709	1676	15	1577	23	1803	21	1803	21	12.5
DL_030118_1_137	378	2.474	3.825	0.066	0.2643	0.0045	0.80152	1596	14	1511	23	1708	20	1708	20	11.5
DL_030118_1_138	302.7	2.917	1.825	0.019	0.1733	0.0012	0.67417	1054.4	6.9	1029.9	6.9	1102	16	1102	16	6.5
DL_030118_1_139	179	0.87	4.034	0.037	0.2705	0.0023	0.55642	1640.1	7.5	1543	11	1759	15	1759	15	12.3
DL_030118_1_140	62.7	0.5044	15.55	0.19	0.5457	0.0064	0.73971	2847	12	2805	27	2875	13	2875	13	2.4
DL_030118_1_141	111.3	0.986	4.407	0.066	0.3034	0.0038	0.71459	1711	13	1707	19	1715	20	1715	20	0.5
DL_030118_1_142	418	1.194	4.145	0.041	0.2845	0.0025	0.86589	1662.1	8.2	1616	13	1723	12	1723	12	6.2
DL_030118_1_143	78.3	0.879	3.118	0.054	0.2468	0.004	0.64495	1434	13	1421	21	1458	27	1458	27	2.5

## Sheet: DL-271217
DL_271217 – Wood Canyon Formation -- 37.166405, -117.708913
Sample Name:								207/235		206/238		207/206		Best age
Grain #	[U] ppm	U/Th	207/235	2σ error	206/238	2σ error	RHO	Age Ma	2σ error	Age (Ma)	2σ error	Age (Ma)	2σ error	(Ma)	2σ error	% Discordance*
DL_271217_1	126.4	0.884	4.825	0.076	0.3165	0.0051	0.71913	1786	13	1771	25	1815	20	1815	20	2.4
DL_271217_2	281.8	1.191	4.311	0.068	0.2764	0.0039	0.62584	1694	13	1572	20	1845	19	1845	19	14.8
DL_271217_3	119.1	1.469	4.799	0.085	0.311	0.0055	0.65734	1784	15	1743	27	1842	26	1842	26	5.4
DL_271217_4	293	0.6824	2.404	0.031	0.2107	0.0028	0.76767	1242.1	9.2	1232	15	1259	17	1259	17	2.1
DL_271217_5	151.6	2.37	2.997	0.046	0.2372	0.0034	0.70007	1404	12	1371	18	1458	22	1458	22	6
DL_271217_6	503	1.426	14.59	0.17	0.5386	0.0058	0.74791	2789	11	2776	24	2796	13	2796	13	0.7
DL_271217_7	270.2	2.289	4.295	0.073	0.2927	0.0041	0.6757	1689	14	1654	21	1732	22	1732	22	4.5
DL_271217_8	419	1.81	2.426	0.059	0.1939	0.0043	0.88418	1248	18	1142	23	1441	22	1441	22	20.7
DL_271217_9	204.9	1.569	18.02	0.28	0.5664	0.0076	0.81649	2987	15	2890	31	3057	15	3057	15	5.5
DL_271217_10	155	0.705	13.28	0.18	0.5104	0.0069	0.70621	2699	13	2656	30	2733	18	2733	18	2.8
DL_271217_11	195	1.738	4.516	0.066	0.3047	0.0042	0.76357	1731	12	1716	21	1758	18	1758	18	2.4
DL_271217_12	69.2	2.02	4.106	0.054	0.286	0.0029	0.61557	1656	11	1621	14	1705	19	1705	19	4.9
DL_271217_13	247.1	2.142	4.221	0.057	0.2832	0.0033	0.70782	1676	11	1607	17	1771	17	1771	17	9.3
DL_271217_14	104	0.652	4.491	0.059	0.3023	0.0031	0.64008	1727	11	1702	15	1764	19	1764	19	3.5
DL_271217_15	138	0.869	4.913	0.086	0.3188	0.0055	0.77961	1801	15	1782	27	1837	21	1837	21	3
DL_271217_16	148.6	0.741	2.845	0.048	0.2311	0.0034	0.61021	1366	13	1340	18	1412	25	1412	25	5.1
DL_271217_17	60.5	1.236	4.688	0.068	0.3094	0.0037	0.64141	1762	12	1739	19	1798	21	1798	21	3.3
DL_271217_18	76.1	1.081	2.738	0.045	0.2285	0.003	0.5837	1338	13	1326	16	1372	27	1372	27	3.4
DL_271217_19	388.9	5.11	4.692	0.064	0.3105	0.0041	0.74617	1765	12	1742	20	1806	17	1806	17	3.5
DL_271217_20	122.6	1.026	3.041	0.043	0.2408	0.0032	0.69026	1417	11	1390	17	1469	24	1469	24	5.4
DL_271217_21	356.1	2.171	4.764	0.067	0.3182	0.0044	0.65648	1776	12	1779	22	1786	20	1786	20	0.4
DL_271217_22	75.01	3.58	4.905	0.071	0.3196	0.0039	0.57227	1801	12	1787	19	1831	22	1831	22	2.4
DL_271217_23	358	1.53	12.09	0.15	0.4979	0.0063	0.70802	2609	11	2607	28	2628	13	2628	13	0.8
DL_271217_24	117.4	1.67	2.888	0.05	0.2314	0.0031	0.51947	1376	13	1341	16	1442	28	1442	28	7
DL_271217_25	367	2.609	4.39	0.054	0.3053	0.0041	0.73243	1709	10	1717	20	1710	17	1710	17	0.4
DL_271217_26	75.4	2.06	3.75	0.19	0.2431	0.006	0.4928	1574	40	1401	31	1810	77	1810	77	22.6
DL_271217_27	281.8	2.169	4.71	0.085	0.3103	0.0051	0.87724	1768	15	1741	25	1810	16	1810	16	3.8
DL_271217_28	209	1.216	15.2	0.19	0.5432	0.0068	0.78041	2826	12	2795	28	2864	14	2864	14	2.4
DL_271217_29	189.3	0.916	9.55	0.13	0.4233	0.0052	0.857	2391	13	2274	24	2504	12	2504	12	9.2
DL_271217_30	451	2.167	4.758	0.07	0.3142	0.0034	0.66702	1775	12	1760	17	1799	20	1799	20	2.2
DL_271217_31	57.2	1.457	4.549	0.069	0.2983	0.0041	0.60327	1737	13	1681	20	1811	23	1811	23	7.2
DL_271217_32	121.9	1.17	5.11	0.082	0.3232	0.0041	0.66431	1834	13	1804	20	1885	21	1885	21	4.3
DL_271217_33	201.5	1.523	15.21	0.27	0.5222	0.0073	0.81015	2823	16	2706	31	2906	16	2906	16	6.9
DL_271217_34	237.9	0.861	12.54	0.15	0.5003	0.0065	0.79802	2643	11	2616	28	2680	13	2680	13	2.4
DL_271217_35	340	1.655	4.542	0.049	0.3056	0.0033	0.73539	1737.3	8.9	1718	16	1766	14	1766	14	2.7
DL_271217_36	145.4	0.815	3.984	0.07	0.2798	0.0043	0.67557	1627	14	1589	22	1687	26	1687	26	5.8
DL_271217_37	458	1.839	4.6	0.11	0.3082	0.0062	0.68347	1745	20	1731	31	1778	33	1778	33	2.6
DL_271217_38	259.7	1.547	4.954	0.058	0.3199	0.004	0.80119	1809.8	9.8	1788	19	1838	15	1838	15	2.7
DL_271217_39	437	2.173	4.484	0.047	0.3007	0.0027	0.69134	1727.1	8.7	1697	13	1768	15	1768	15	4
DL_271217_40	506	2.72	4.75	0.14	0.3142	0.0089	0.91284	1770	26	1759	44	1787	22	1787	22	1.6
DL_271217_41	385	1.301	3.972	0.048	0.2775	0.0029	0.81306	1628.2	9.4	1578	15	1690	13	1690	13	6.6
DL_271217_42	220.8	1.944	4.652	0.086	0.3143	0.0052	0.85486	1756	15	1760	26	1761	18	1761	18	0.1
DL_271217_43	685	15.43	4.348	0.053	0.2987	0.0037	0.7298	1701	10	1689	18	1722	15	1722	15	1.9
DL_271217_44	699	1.915	4.708	0.059	0.3161	0.0045	0.70985	1767	11	1772	22	1758	14	1758	14	0.8
DL_271217_45	938	6.265	4.054	0.08	0.2723	0.0051	0.63626	1642	16	1551	26	1741	19	1741	19	10.9
DL_271217_46	788	3.06	3.51	0.16	0.1555	0.0044	0.90735	1520	35	931	24	2471	37	DISC	DISC	62.3
DL_271217_47	396	0.933	4.493	0.071	0.275	0.0037	0.77321	1728	13	1565	19	1925	18	1925	18	18.7
DL_271217_48	570	2.85	5.206	0.087	0.2969	0.0048	0.7223	1852	14	1675	24	2048	20	2048	20	18.2
DL_271217_49	291.7	1.958	4.583	0.067	0.3014	0.004	0.70546	1743	12	1697	20	1799	21	1799	21	5.7
DL_271217_50	128.9	1.839	4.34	0.075	0.2921	0.0039	0.60334	1699	14	1651	20	1746	26
DL_271217_51	76.9	0.973	13.71	0.19	0.5151	0.0064	0.80482	2728	13	2676	28	2765	13	2765	13	3.2
DL_271217_52	394	1.533	2.727	0.058	0.1919	0.0033	0.87499	1332	15	1131	18	1661	18	DISC	DISC	31.9
DL_271217_53	430	1.754	4.471	0.086	0.2831	0.0047	0.86211	1721	16	1608	23	1861	18	1861	18	13.6
DL_271217_54	367	1.71	4.313	0.075	0.2748	0.0048	0.80868	1695	15	1564	24	1851	18	1851	18	15.5
DL_271217_55	464	6.39	4.909	0.053	0.3156	0.0027	0.77126	1803.4	9	1768	13	1839	12	1839	12	3.9
DL_271217_56	173.9	1.076	4.637	0.068	0.3051	0.0042	0.77232	1753	12	1715	21	1788	20	1788	20	4.1
DL_271217_57	251	0.932	2.686	0.046	0.2228	0.0026	0.66001	1327	13	1296	14	1368	26	1368	26	5.3
DL_271217_58	260.9	1.253	4.51	0.063	0.3058	0.0043	0.76859	1730	12	1719	21	1745	18	1745	18	1.5
DL_271217_59	390.6	2.559	4.508	0.06	0.3034	0.0043	0.84639	1730	11	1707	21	1760	17	1760	17	3
DL_271217_60	348.4	1.909	4.542	0.048	0.2998	0.0028	0.63023	1740.2	8.3	1690	14	1783	13	1783	13	5.2
DL_271217_61	272	0.96	4.243	0.057	0.2943	0.0036	0.76063	1680	11	1664	18	1696	17	1696	17	1.9
DL_271217_62	111.8	1.032	5.305	0.074	0.3268	0.0043	0.604	1867	12	1822	21	1916	23	1916	23	4.9
DL_271217_63	239.7	0.797	11.59	0.14	0.4849	0.0052	0.81811	2571	11	2547	23	2586	12	2586	12	1.5
DL_271217_64	294	1.158	2.968	0.053	0.2347	0.0035	0.68705	1396	13	1358	18	1450	26	1450	26	6.3
DL_271217_65	591	1.32	5.066	0.071	0.3113	0.0041	0.62701	1829	12	1746	20	1918	21	1918	21	9
DL_271217_66	256.9	1.622	15.58	0.18	0.5494	0.0065	0.69175	2849	11	2824	26	2871	14	2871	14	1.6
DL_271217_67	92.8	1.043	4.59	0.055	0.3025	0.0032	0.56378	1746.8	9.7	1703	16	1788	20	1788	20	4.8
DL_271217_68	224	0.764	4.523	0.043	0.3006	0.0024	0.61934	1734	7.9	1694	12	1778	14	1778	14	4.7
DL_271217_69	354.3	1.011	10.58	0.25	0.4432	0.009	0.80625	2484	21	2363	40	2586	25	2586	25	8.6
DL_271217_70	130.5	1.485	10.49	0.17	0.4724	0.0083	0.8742	2475	15	2490	36	2464	13	2464	13	1.1
DL_271217_71	162.1	1.378	2.956	0.049	0.2329	0.0039	0.72941	1395	13	1349	21	1461	25	1461	25	7.7
DL_271217_72	95.8	1.031	2.836	0.07	0.2271	0.0052	0.66316	1362	19	1318	27	1441	38	1441	38	8.5
DL_271217_73	597	1.797	6.03	0.1	0.3483	0.006	0.76067	1979	15	1925	29	2030	22	2030	22	5.2
DL_271217_74	162.7	1.3	4.042	0.075	0.2843	0.0053	0.81138	1640	15	1611	26	1679	20	1679	20	4.1
DL_271217_75	146.2	1.698	4.327	0.065	0.3012	0.004	0.59446	1699	13	1696	20	1701	22	1701	22	0.3
DL_271217_76	223.7	1.33	4.434	0.056	0.297	0.0034	0.62727	1717	10	1676	17	1771	18	1771	18	5.4
DL_271217_77	192.1	1.297	4.535	0.046	0.2994	0.0027	0.57709	1737	8.7	1688	13	1794	17	1794	17	5.9
DL_271217_78	444	1.558	4.524	0.043	0.2968	0.003	0.64428	1734.2	7.9	1675	15	1808	14	1808	14	7.4
DL_271217_79	377	1.881	2.668	0.024	0.2251	0.0017	0.61151	1318.8	6.7	1308.6	9	1333	14	1333	14	1.8
DL_271217_80	85.3	0.4535	19.36	0.24	0.5881	0.0059	0.68066	3059	12	2983	24	3109	15	3109	15	4.1
DL_271217_81	82.4	1.012	5.587	0.075	0.3381	0.0038	0.68009	1912	12	1877	19	1949	19	1949	19	3.7
DL_271217_82	56	1.126	12.22	0.17	0.4816	0.0052	0.69507	2618	13	2533	22	2681	17	2681	17	5.5
DL_271217_83	309	1.278	7.71	0.16	0.3263	0.0061	0.87554	2195	19	1820	30	2568	17	2568	17	29.1
DL_271217_84	281.1	2.363	4.568	0.05	0.3051	0.0033	0.70296	1741.8	9.2	1716	16	1773	16	1773	16	3.2
DL_271217_85	824	1.292	3.582	0.061	0.2361	0.0037	0.91778	1542	13	1365	19	1795	12	1795	12	24
DL_271217_86	360	1.468	4.526	0.047	0.3034	0.003	0.61653	1734.7	8.6	1707	15	1767	16	1767	16	3.4
DL_271217_87	178.7	0.924	2.449	0.044	0.2021	0.0031	0.80366	1254	13	1186	16	1380	23	1380	23	14.1
DL_271217_88	76	0.636	2.86	0.049	0.2282	0.003	0.64354	1368	13	1324	16	1442	26	1442	26	8.2
DL_271217_89	287	2.58	4.012	0.056	0.2802	0.0031	0.78649	1634	11	1592	15	1690	16	1690	16	5.8
DL_271217_90	136.3	1.468	10.76	0.14	0.4584	0.0046	0.75853	2500	12	2431	21	2557	14	2557	14	4.9
DL_271217_91	85.7	1.135	18.39	0.21	0.5747	0.0066	0.8354	3008	11	2925	27	3065	11	3065	11	4.6
DL_271217_92	132.2	1.147	4.573	0.055	0.304	0.0032	0.6082	1744	10	1711	16	1788	19	1788	19	4.3
DL_271217_93	419	2.033	4.492	0.052	0.3018	0.0035	0.7867	1728.9	9.9	1702	18	1767	15	1767	15	3.7
DL_271217_94	123.7	1.985	2.915	0.043	0.231	0.0029	0.49646	1384	11	1339	15	1455	26	1455	26	8
DL_271217_95	336.6	0.768	15.28	0.19	0.5445	0.0075	0.87638	2832	12	2799	31	2858.7	9.6	2858.7	9.6	2.1
DL_271217_96	368	0.6494	11.84	0.12	0.4881	0.0045	0.77726	2589.9	9.7	2561	19	2616	11	2616	11	2.1
DL_271217_97	276.2	0.4	8.84	0.16	0.4218	0.0051	0.8612	2317	16	2267	23	2361	16	2361	16	4
DL_271217_98	177	0.869	4.49	0.055	0.3014	0.0032	0.6233	1727	10	1697	16	1769	18	1769	18	4.1
DL_271217_99	250	0.806	4.31	0.059	0.2895	0.0037	0.65609	1693	11	1638	19	1767	20	1767	20	7.3
DL_271217_100	481	3	3.89	0.16	0.262	0.01	0.89794	1606	32	1498	52	1770	27	1770	27	15.4
DL_271217_101	100.1	0.847	4.535	0.066	0.303	0.0039	0.71867	1735	12	1705	19	1780	19	1780	19	4.2
DL_271217_102	580	1.919	3.929	0.067	0.263	0.0041	0.81041	1619	13	1504	21	1778	18	1778	18	15.4
DL_271217_103	235	4.49	4.565	0.061	0.3036	0.0033	0.71549	1742	11	1708	16	1788	16	1788	16	4.5
DL_271217_104	400	1.395	4.561	0.066	0.3066	0.004	0.67704	1739	12	1723	20	1764	19	1764	19	2.3
DL_271217_105	86.4	2.126	3.991	0.059	0.2812	0.0042	0.63608	1630	12	1596	21	1685	22	1685	22	5.3
DL_271217_106	166.4	1.324	4.934	0.07	0.3139	0.004	0.63929	1805	12	1759	19	1867	21	1867	21	5.8
DL_271217_107	250.4	1.917	4.959	0.065	0.3185	0.0035	0.72115	1811	11	1782	17	1853	16	1853	16	3.8
DL_271217_108	203.8	1.289	14.9	0.23	0.5322	0.007	0.74066	2806	15	2749	29	2855	18	2855	18	3.7
DL_271217_109	668	2.222	4.639	0.067	0.3121	0.004	0.62636	1754	12	1750	20	1769	21	1769	21	1.1
DL_271217_110	181	0.562	4.423	0.068	0.2966	0.0038	0.79564	1717	13	1673	19	1771	17	1771	17	5.5
DL_271217_111	178.5	2.576	2.938	0.044	0.2412	0.0028	0.68461	1389	11	1392	14	1386	21	1386	21	0.4
DL_271217_112	149.3	0.957	2.744	0.042	0.2232	0.0024	0.62171	1338	11	1298	13	1398	23	1398	23	7.2
DL_271217_113	575	4.91	4.402	0.066	0.2874	0.0038	0.74003	1710	12	1630	19	1828	20	1828	20	10.8
DL_271217_114	131.8	1.174	3.016	0.055	0.2409	0.0038	0.62097	1408	14	1390	20	1448	27	1448	27	4
DL_271217_115	95.9	1.438	4.389	0.075	0.2993	0.0048	0.6955	1708	14	1686	24	1749	24	1749	24	3.6
DL_271217_116	186.1	1.429	1.868	0.025	0.1787	0.0022	0.61853	1068.2	9	1061	12	1093	23	1093	23	2.9
DL_271217_117	418	1.727	4.77	0.089	0.3095	0.0041	0.68654	1775	15	1737	20	1826	25	1826	25	4.9
DL_271217_118	170.9	5.4	5.148	0.054	0.3252	0.0029	0.71537	1842.6	8.8	1814	14	1879	13	1879	13	3.5
DL_271217_119	434	2.071	4.444	0.045	0.298	0.0028	0.66888	1719.3	8.3	1681	14	1763	13	1763	13	4.7
DL_271217_120	371	2.088	4.687	0.059	0.314	0.0039	0.69766	1763	11	1759	19	1771	15	1771	15	0.7
DL_271217_121	259	0.813	2.698	0.045	0.2161	0.0031	0.70518	1325	12	1261	17	1438	22	1438	22	12.3
DL_271217_122	140.4	1.439	2.977	0.038	0.2404	0.0028	0.66077	1399.9	9.8	1388	15	1424	20	1424	20	2.5
DL_271217_123	268	0.759	8.85	0.14	0.3641	0.0056	0.79598	2319	15	2000	26	2617	17	2617	17	23.6
DL_271217_124	896	2.904	3.741	0.055	0.2559	0.0039	0.77594	1577	12	1468	20	1730	18	1730	18	15.1
DL_271217_125	240.7	0.888	4.388	0.054	0.2977	0.0035	0.74513	1711	11	1681	18	1753	16	1753	16	4.1
DL_271217_126	137.3	2.541	2.963	0.042	0.238	0.0031	0.23889	1396	11	1377	16	1417	22	1417	22	2.8
DL_271217_127	334.7	0.874	2.69	0.033	0.2241	0.0025	0.75772	1324.1	9.1	1303	13	1357	15	1357	15	4
DL_271217_128	200	1.544	2.773	0.038	0.2294	0.0024	0.60319	1347	10	1331	13	1367	21	1367	21	2.6
DL_271217_129	95.4	2.81	11.5	0.16	0.456	0.0058	0.80024	2563	13	2421	26	2667	15	2667	15	9.2
DL_271217_130	79.6	1.61	5.08	0.062	0.3214	0.0033	0.57046	1831	10	1796	16	1867	19	1867	19	3.8
DL_271217_131	159	1.194	4.815	0.083	0.3142	0.0048	0.75841	1784	14	1760	24	1786	23	1786	23	1.5
DL_271217_132	168.8	1.915	4.592	0.052	0.3031	0.0032	0.67833	1747.2	9.7	1706	16	1784	17	1784	17	4.4
DL_271217_133	189.9	1.748	2.765	0.039	0.2202	0.0025	0.52821	1344	11	1282	13	1427	23	1427	23	10.2
DL_271217_134	173.9	1.241	11.28	0.12	0.4665	0.005	0.73834	2544.5	9.8	2467	22	2601	13	2601	13	5.2
DL_271217_135	82.1	0.5945	2.833	0.041	0.2294	0.0022	0.4379	1362	11	1331	11	1397	25	1397	25	4.7
DL_271217_136	67.6	0.992	2.98	0.061	0.2333	0.0042	0.11425	1398	16	1350	22	1461	33	1461	33	7.6
DL_271217_137	630	3.513	4.664	0.055	0.3128	0.0038	0.75477	1759.1	9.9	1753	19	1755	15	1755	15	0.1
DL_271217_138	103.7	1.16	4.413	0.089	0.2946	0.0047	0.56751	1712	16	1664	23	1761	32	1761	32	5.5
DL_271217_139	120.3	0.914	4.927	0.09	0.3158	0.0048	0.6717	1804	16	1768	24	1838	26	1838	26	3.8
DL_271217_140	324	2.72	4.604	0.044	0.3096	0.0026	0.63497	1749.4	8	1738	13	1759	15	1759	15	1.2
DL_271217_141	75.5	1.183	2.77	0.064	0.229	0.0056	0.69616	1345	17	1333	28	1366	36	1366	36	2.4
DL_271217_142	204.3	1.713	4.405	0.057	0.2993	0.0028	0.72766	1711	11	1687	14	1729	18	1729	18	2.4
DL_271217_143	341.4	1.658	4.478	0.064	0.299	0.0036	0.73629	1725	12	1686	18	1769	18	1769	18	4.7
DL_271217_144	212.9	3.245	1.985	0.029	0.1856	0.0021	0.64471	1110	10	1097	11	1126	23	1126	23	2.6
DL_271217_145	142.2	1.418	4.871	0.075	0.3131	0.0041	0.64061	1796	13	1755	20	1846	22	1846	22	4.9
DL_271217_146	353	1.752	4.636	0.057	0.3077	0.0035	0.76714	1756	10	1728	17	1783	14	1783	14	3.1

## Sheet: DL-040118-1
DL_040118_1 – Carrara Formation - 37.223652, -117.711052
Sample Name:								207/235		206/238		207/206		Best age
Grain #	[U] ppm	U/Th	207/235	2σ error	206/238	2σ error	RHO	Age Ma	2σ error	Age (Ma)	2σ error	Age (Ma)	2σ error	(Ma)	2σ error	% Discordance*
DL_040118_1_1	227	0.81	3.504	0.089	0.2442	0.0057	0.81136	1524	20	1407	30	1694	28	1694	28	16.9
DL_040118_1_2	142	0.657	2.608	0.061	0.2135	0.0052	0.75151	1300	17	1246	28	1390	34	1390	34	10.4
DL_040118_1_3	297	0.926	2.793	0.03	0.2303	0.0025	0.67787	1353.7	8.2	1335	13	1380	18	1380	18	3.3
DL_040118_1_4	132.9	0.3756	2.425	0.043	0.1841	0.0028	0.72308	1247	13	1089	15	1526	24	1526	24	28.6
DL_040118_1_5	190.6	5.01	4.821	0.044	0.3237	0.0029	0.57199	1787.5	7.7	1807	14	1761	15	1761	15	2.6
DL_040118_1_6	199.1	1.456	4.419	0.041	0.3057	0.0031	0.5774	1716	7.9	1719	15	1702	16	1702	16	1
DL_040118_1_7	189.1	0.956	2.61	0.029	0.2164	0.0019	0.50452	1302.2	8.3	1263	10	1361	20	1361	20	7.2
DL_040118_1_8	465.3	0.893	4.163	0.097	0.2789	0.0081	0.75022	1673	19	1584	41	1764	36	1764	36	10.2
DL_040118_1_9	232.2	0.756	4.439	0.069	0.2954	0.0032	0.67612	1719	13	1668	16	1783	21	1783	21	6.4
DL_040118_1_10	147.4	1.675	2.954	0.044	0.2315	0.0028	0.55339	1394	11	1342	15	1469	25	1469	25	8.6
DL_040118_1_11	270.8	1.51	4.247	0.048	0.2846	0.0032	0.70315	1681.7	9.4	1614	16	1767	14	1767	14	8.7
DL_040118_1_12	126.8	0.574	4.879	0.079	0.305	0.0055	0.65139	1797	14	1715	27	1880	27	1880	27	8.8
DL_040118_1_13	58.5	0.634	4.484	0.085	0.3063	0.0041	0.60309	1724	16	1722	20	1740	28	1740	28	1
DL_040118_1_14	156.9	1.508	4.552	0.047	0.3096	0.0028	0.52433	1739.3	8.6	1738	14	1737	17	1737	17	0.1
DL_040118_1_15	102.9	1.286	4.261	0.085	0.2974	0.0049	0.71814	1682	16	1677	24	1682	26	1682	26	0.3
DL_040118_1_16	289.9	0.717	2.193	0.027	0.1952	0.0022	0.65072	1177.7	8.5	1149	12	1225	20	1225	20	6.2
DL_040118_1_17	150	1.888	4.724	0.056	0.3167	0.0035	0.68681	1770	10	1773	17	1769	18	1769	18	0.2
DL_040118_1_18	193.9	0.715	11.91	0.13	0.4782	0.0049	0.71002	2595.7	9.8	2518	21	2654	13	2654	13	5.1
DL_040118_1_19	163.5	1.759	3.152	0.037	0.2499	0.0023	0.56009	1444	9	1438	12	1452	18	1452	18	1
DL_040118_1_20	145.4	1.976	4.646	0.049	0.3126	0.0026	0.43131	1756.2	8.9	1753	13	1756	19	1756	19	0.2
DL_040118_1_21	179	0.6408	18.09	0.16	0.5257	0.0051	0.7727	2993	8.7	2722	22	3179	10	3179	10	14.4
DL_040118_1_22	356	1.625	3.844	0.043	0.2699	0.0027	0.71992	1600.6	9.1	1540	14	1683	15	1683	15	8.5
DL_040118_1_23	173.7	2.024	4.331	0.038	0.3028	0.0029	0.56206	1698.3	7.3	1705	15	1693	17	1693	17	0.7
DL_040118_1_24	178.4	1.57	4.296	0.042	0.2991	0.0029	0.5439	1691.5	8	1686	14	1692	20	1692	20	0.4
DL_040118_1_25	177	1.829	3.056	0.035	0.2466	0.0024	0.60067	1420.5	8.8	1420	12	1414	19	1414	19	0.4
DL_040118_1_26	363	2.79	8.8	0.25	0.386	0.012	0.68725	2316	26	2104	56	2505	40	2505	40	16
DL_040118_1_27	311.4	0.991	7.39	0.17	0.3056	0.0056	0.86038	2157	21	1718	28	2604	20	DISC	DISC	34
DL_040118_1_28	83.36	2.811	3.069	0.041	0.249	0.0026	0.51522	1423	10	1433	13	1405	23	1405	23	2
DL_040118_1_29	402	1.479	15.68	0.34	0.532	0.013	0.88618	2854	21	2748	57	2927	19	2927	19	6.1
DL_040118_1_30	213.4	4.5	4.198	0.042	0.3008	0.0028	0.64912	1673.5	8	1696	14	1642	15	1642	15	3.3
DL_040118_1_31	95.9	1.106	4.478	0.052	0.3102	0.0026	0.50276	1725.4	9.6	1741	13	1704	20	1704	20	2.2
DL_040118_1_32	153.8	0.546	5.138	0.057	0.3283	0.0035	0.6815	1840.8	9.4	1830	17	1847	15	1847	15	0.9
DL_040118_1_33	96.3	1.215	2.558	0.037	0.2225	0.0027	0.43476	1288	11	1294	14	1275	28	1275	28	1.5
DL_040118_1_34	130	0.5457	14.9	0.21	0.5254	0.0071	0.77952	2807	13	2720	30	2872	14	2872	14	5.3
DL_040118_1_35	288	0.754	10.79	0.17	0.4393	0.0074	0.88085	2501	15	2345	33	2634	13	2634	13	11
DL_040118_1_36	231.2	1.397	4.628	0.044	0.3082	0.0028	0.74024	1753.2	7.9	1732	14	1780	12	1780	12	2.7
DL_040118_1_37	380	1.177	9.31	0.18	0.4222	0.0067	0.74116	2367	17	2268	30	2448	21	2448	21	7.4
DL_040118_1_38	510	2.41	3.077	0.039	0.2481	0.0031	0.89691	1425	10	1428	16	1426	14	1426	14	0.1
DL_040118_1_39	307	1.595	4.141	0.046	0.2886	0.0028	0.72775	1661	9.1	1634	14	1691	15	1691	15	3.4
DL_040118_1_40	423.9	0.872	20.87	0.3	0.6174	0.0089	0.76548	3130	14	3097	35	3147	13	3147	13	1.6
DL_040118_1_41	128.1	2.101	2.848	0.063	0.2378	0.0044	0.59428	1365	17	1374	23	1356	36	1356	36	1.3
DL_040118_1_42	150.3	2.32	4.384	0.047	0.305	0.0026	0.52315	1708	9	1716	13	1697	18	1697	18	1.1
DL_040118_1_43	374.2	1.261	3.057	0.051	0.2458	0.0036	0.86939	1421	13	1416	19	1428	16	1428	16	0.8
DL_040118_1_44	191.9	1.035	3.125	0.037	0.2484	0.0023	0.58301	1437.4	9.2	1430	12	1446	19	1446	19	1.1
DL_040118_1_45	405.4	2.2	3.108	0.03	0.2464	0.0021	0.62941	1433.8	7.4	1420	11	1452	14	1452	14	2.2
DL_040118_1_46	164.1	2.641	3.231	0.037	0.2567	0.0027	0.54084	1463.4	8.8	1472	14	1445	21	1445	21	1.9
DL_040118_1_47	212.2	1.84	4.267	0.083	0.3032	0.0052	0.70265	1685	17	1706	26	1658	26	1658	26	2.9
DL_040118_1_48	154.1	1.898	4.148	0.055	0.2889	0.0035	0.78724	1662	11	1635	18	1702	16	1702	16	3.9
DL_040118_1_49	278.8	2.929	4.449	0.043	0.3034	0.003	0.63564	1722.5	8.1	1708	15	1735	15	1735	15	1.6
DL_040118_1_50	76.2	1.016	2.814	0.043	0.2352	0.0026	0.56278	1357	11	1361	14	1340	26	1340	26	1.6
DL_040118_1_51	109.8	0.4358	2.294	0.036	0.2045	0.0028	0.45658	1208	11	1199	15	1223	30	1223	30	2
DL_040118_1_52	217.5	1.909	4.733	0.061	0.3143	0.003	0.59882	1772	10	1761	15	1788	21	1788	21	1.5
DL_040118_1_53	376.8	1.672	4.406	0.049	0.3039	0.0033	0.76535	1712	9	1710	16	1708	15	1708	15	0.1
DL_040118_1_54	257	3.66	4.545	0.048	0.316	0.003	0.54997	1737.9	8.6	1770	14	1707	18	1707	18	3.7
DL_040118_1_55	183.2	0.789	3.285	0.039	0.2576	0.0024	0.50889	1477.3	8.9	1477	12	1477	19	1477	19	0
DL_040118_1_56	230.4	1.5	3.07	0.033	0.2473	0.0024	0.60794	1424	8.2	1424	12	1421	18	1421	18	0.2
DL_040118_1_57	137.6	0.509	2.159	0.04	0.1761	0.0022	0.69421	1167	13	1045	12	1396	27	1396	27	25.1
DL_040118_1_58	311.1	1.484	3.044	0.044	0.2457	0.0035	0.55927	1418	11	1416	18	1414	27	1414	27	0.1
DL_040118_1_59	83.9	1.331	3.095	0.048	0.2476	0.0031	0.48671	1431	12	1425	16	1434	27	1434	27	0.6
DL_040118_1_60	151.7	1.535	3.097	0.036	0.247	0.0025	0.55983	1430.5	9	1422	13	1442	20	1442	20	1.4
DL_040118_1_61	271.9	1.456	3.06	0.037	0.2424	0.0028	0.77402	1421.3	9.3	1399	15	1449	14	1449	14	3.5
DL_040118_1_62	90.3	1.181	3.133	0.046	0.2489	0.0027	0.42709	1439	11	1432	14	1446	27	1446	27	1
DL_040118_1_63	453	5.12	3.52	0.055	0.256	0.0028	0.54146	1532	12	1469	14	1621	24	1621	24	9.4
DL_040118_1_64	215.9	2.621	4.764	0.047	0.3232	0.0028	0.56	1777.4	8.3	1805	14	1747	15	1747	15	3.3
DL_040118_1_65	230.1	1.316	3.081	0.06	0.2452	0.0036	0.623	1430	16	1413	19	1451	27	1451	27	2.6
DL_040118_1_66	250	1.855	4.736	0.044	0.3173	0.0026	0.64499	1772.6	7.7	1776	13	1765	13	1765	13	0.6
DL_040118_1_67	452	2.925	1.977	0.022	0.1871	0.0017	0.56094	1106.8	7.4	1105.3	9.4	1112	18	1112	18	0.6
DL_040118_1_68	175.7	0.89	12.78	0.12	0.5131	0.0051	0.6886	2663.7	8.8	2671	22	2660	13	2660	13	0.4
DL_040118_1_69	317.3	1.068	3.147	0.036	0.2525	0.0024	0.6619	1443	8.6	1451	12	1433	17	1433	17	1.3
DL_040118_1_70	164	0.931	4.186	0.059	0.2886	0.0035	0.74349	1669	12	1634	18	1715	18	1715	18	4.7
DL_040118_1_71	132.4	0.783	3.073	0.036	0.2456	0.0023	0.46988	1425.9	9.3	1416	12	1444	22	1444	22	1.9
DL_040118_1_72	120.3	1.475	1.918	0.03	0.181	0.0021	0.43275	1087	10	1072	11	1118	29	1118	29	4.1
DL_040118_1_73	286.2	1.215	3.756	0.067	0.2609	0.0045	0.86417	1581	15	1493	23	1704	17	1704	17	12.4
DL_040118_1_74	328	1.321	1.695	0.019	0.1651	0.0015	0.63269	1005.7	6.9	985.1	8.4	1057	20	1057	20	6.8
DL_040118_1_75	275.6	1.343	4.416	0.047	0.3034	0.0029	0.39835	1714	8.8	1707	14	1723	16	1723	16	0.9
DL_040118_1_76	317	3.32	4.319	0.051	0.2982	0.0034	0.78977	1695.4	9.7	1684	16	1711	14
DL_040118_1_77	202.1	1.489	9.17	0.089	0.411	0.0042	0.71749	2355.1	9.1	2219	19	2478	12	2478	12	10.5
DL_040118_1_78	302.6	1.184	4.048	0.079	0.2805	0.0058	0.84858	1640	16	1592	29	1705	18	1705	18	6.6
DL_040118_1_79	403	1.542	2.962	0.034	0.2084	0.0022	0.77788	1396.6	8.6	1220	12	1681	13	1681	13	27.4
DL_040118_1_80	210.4	1.554	4.571	0.055	0.3025	0.0034	0.7504	1742	10	1703	17	1792	16	1792	16	5
DL_040118_1_81	262	3.44	4.594	0.087	0.3099	0.0054	0.60004	1744	16	1738	26	1754	30	1754	30	0.9
DL_040118_1_82	201.4	2.286	4.512	0.049	0.3125	0.0035	0.61394	1731.8	9.2	1752	17	1709	18	1709	18	2.5
DL_040118_1_83	164	0.974	4.293	0.052	0.2983	0.0032	0.5863	1690.3	9.8	1684	15	1705	19	1705	19	1.2
DL_040118_1_84	376.4	1.674	4.174	0.041	0.2898	0.0028	0.75619	1667.8	8	1642	15	1705	14	1705	14	3.7
DL_040118_1_85	236.5	1.149	3.189	0.035	0.2553	0.0026	0.68188	1454.4	8.7	1465	13	1440	17	1440	17	1.7
DL_040118_1_86	366.3	1.975	3.035	0.028	0.243	0.0018	0.65568	1415.7	6.9	1402	9.1	1433	14	1433	14	2.2
DL_040118_1_87	248.1	1.407	2.363	0.048	0.199	0.0036	0.75353	1232	15	1169	20	1354	28	1354	28	13.7
DL_040118_1_88	359	2.91	4.46	0.11	0.3054	0.0084	0.77266	1715	22	1713	42	1737	32	1737	32	1.4
DL_040118_1_89	268	2.632	4.44	0.055	0.3086	0.0035	0.65654	1718	10	1735	17	1701	19	1701	19	2
DL_040118_1_90	257.8	1.369	4.01	0.048	0.276	0.0033	0.6782	1636	10	1570	17	1725	18	1725	18	9
DL_040118_1_91	124.5	1.199	4.351	0.053	0.3032	0.0033	0.52143	1701	10	1706	16	1702	21	1702	21	0.2
DL_040118_1_92	331	2.01	4.308	0.062	0.2979	0.0041	0.77401	1696	12	1680	21	1717	17	1717	17	2.2
DL_040118_1_93	205.8	1.018	2.738	0.034	0.2206	0.0023	0.50264	1337.4	9.3	1285	12	1426	22	1426	22	9.9
DL_040118_1_94	162	2.308	4.471	0.055	0.3083	0.0034	0.57609	1724	10	1731	17	1709	18	1709	18	1.3
DL_040118_1_95	206.4	0.948	4.757	0.074	0.3132	0.0039	0.72857	1774	13	1756	19	1793	19	1793	19	2.1
DL_040118_1_96	708	3.569	4.929	0.04	0.3339	0.0033	0.68266	1806.5	6.8	1857	16	1748	13	1748	13	6.2
DL_040118_1_97	222.2	1.767	4.691	0.06	0.3122	0.0041	0.71921	1764	11	1753	21	1771	19	1771	19	1
DL_040118_1_98	524	1.06	3.643	0.054	0.2433	0.0036	0.80438	1557	12	1403	18	1765	14	1765	14	20.5
DL_040118_1_99	185.4	1.2	2.946	0.061	0.2389	0.0047	0.7465	1393	15	1380	24	1427	27	1427	27	3.3
DL_040118_1_100	207.3	1.193	3.188	0.05	0.2548	0.0033	0.52466	1452	12	1462	17	1434	26	1434	26	2
DL_040118_1_101	185.3	1.941	3.289	0.041	0.2561	0.0025	0.47655	1476.9	9.7	1469	13	1485	22	1485	22	1.1
DL_040118_1_102	161.2	2.54	3.117	0.036	0.2486	0.0023	0.48821	1435.4	8.9	1431	12	1440	20	1440	20	0.6
DL_040118_1_103	177.8	1.463	4.854	0.059	0.3215	0.0034	0.57261	1793	10	1797	17	1793	18	1793	18	0.2
DL_040118_1_104	336	2.168	1.839	0.023	0.1734	0.0027	0.70685	1058.4	8.5	1033	14	1105	22	1105	22	6.5
DL_040118_1_105	212.3	2.519	3.117	0.032	0.248	0.0023	0.51178	1436.8	7.7	1428	12	1446	18	1446	18	1.2
DL_040118_1_106	416.8	1.391	2.658	0.03	0.2117	0.002	0.61556	1316.6	8.5	1238	11	1439	19	1439	19	14
DL_040118_1_107	308.8	2.111	4.925	0.06	0.326	0.0036	0.70787	1805	10	1818	18	1791	16	1791	16	1.5
DL_040118_1_108	158.3	0.864	2.927	0.072	0.2386	0.0059	0.84083	1383	19	1381	31	1397	25	1397	25	1.1
DL_040118_1_109	206.7	1.695	4.439	0.06	0.307	0.0037	0.67544	1717	11	1725	18	1725	18	1725	18	0
DL_040118_1_110	147.8	2.709	4.977	0.067	0.3243	0.0034	0.6288	1813	11	1812	16	1820	19	1820	19	0.4
DL_040118_1_111	219.9	1.291	3.789	0.055	0.2618	0.0037	0.72192	1591	12	1498	19	1724	19	1724	19	13.1
DL_040118_1_112	76.8	1.091	3.207	0.048	0.2517	0.0029	0.46243	1458	11	1447	15	1470	26	1470	26	1.6
DL_040118_1_113	187.1	1.677	4.26	0.1	0.296	0.0065	0.86748	1681	20	1673	33	1702	20	1702	20	1.7
DL_040118_1_114	213.4	1.747	2.462	0.037	0.1969	0.0025	0.81209	1259	11	1158	14	1437	19	1437	19	19.4
DL_040118_1_115	264.2	1.563	4.45	0.11	0.3012	0.0059	0.68565	1716	21	1695	29	1741	34	1741	34	2.6
DL_040118_1_116	217.8	1.903	4.698	0.096	0.3082	0.0061	0.82987	1764	18	1733	31	1811	20	1811	20	4.3
DL_040118_1_117	266	1.399	1.438	0.036	0.1471	0.0033	0.51207	903	15	884	18	931	47	931	47	5
DL_040118_1_118	329	1.329	4.6	0.12	0.2987	0.0085	0.7393	1742	22	1687	41	1814	33	1814	33	7
DL_040118_1_119	73.6	1.26	4.37	0.085	0.3012	0.0045	0.71516	1702	16	1699	23	1707	26	1707	26	0.5
DL_040118_1_120	547	1.343	3.45	0.11	0.2461	0.0079	0.87341	1505	25	1414	40	1640	23	1640	23	13.8
DL_040118_1_121	311	3.321	4.598	0.049	0.3114	0.0032	0.62031	1747.6	8.9	1747	16	1741	17	1741	17	0.3
DL_040118_1_122	569	1.532	3.655	0.08	0.2579	0.0055	0.88361	1561	17	1478	28	1676	18	1676	18	11.8
DL_040118_1_123	348.9	1.996	4.939	0.06	0.3271	0.0043	0.61465	1810	10	1823	21	1791	20	1791	20	1.8
DL_040118_1_124	348	2.04	3.96	0.12	0.2777	0.0094	0.80138	1621	25	1577	47	1684	38	1684	38	6.4
DL_040118_1_125	583	2.293	4.363	0.084	0.3029	0.0054	0.7367	1701	16	1704	27	1705	24	1705	24	0.1
DL_040118_1_126	95.7	0.765	3.053	0.066	0.2116	0.0044	0.81169	1416	17	1236	23	1704	23	1704	23	27.5
DL_040118_1_127	76.1	1.39	4.769	0.063	0.3164	0.0037	0.52006	1777	11	1776	18	1782	21	1782	21	0.3
DL_040118_1_128	211	0.604	2.693	0.046	0.2236	0.0036	0.7477	1324	13	1300	19	1363	23	1363	23	4.6
DL_040118_1_129	174	1.848	4.217	0.083	0.2883	0.0059	0.7284	1677	17	1634	31	1731	29	1731	29	5.6
DL_040118_1_130	134.3	1.324	3.162	0.042	0.253	0.0024	0.51943	1446	10	1454	12	1433	20	1433	20	1.5
DL_040118_1_131	179.3	0.652	3.227	0.054	0.2321	0.0035	0.79555	1461	13	1345	18	1636	20	1636	20	17.8
DL_040118_1_132	92.7	0.774	3.96	0.12	0.2808	0.0061	0.66539	1624	24	1594	31	1661	42	1661	42	4
DL_040118_1_133	115.3	0.878	3.211	0.038	0.2516	0.0023	0.40331	1458.4	9.1	1446	12	1476	24	1476	24	2
DL_040118_1_134	186.5	1.918	3.114	0.034	0.248	0.0019	0.5542	1437	8.3	1427.9	9.7	1446	17	1446	17	1.3
DL_040118_1_135	244.8	1.154	3.198	0.041	0.2194	0.0023	0.61454	1455.3	9.9	1278	12	1730	18	1730	18	26.1
DL_040118_1_136	276	2.7	4.84	0.11	0.3182	0.0044	0.7349	1788	19	1780	22	1795	28	1795	28	0.8
DL_040118_1_137	183.1	1.111	2.995	0.038	0.239	0.0027	0.63477	1404.8	9.5	1381	14	1441	20	1441	20	4.2
DL_040118_1_138	154.3	1.06	16.22	0.16	0.5325	0.0047	0.71936	2888.1	9.6	2753	19	2985	12	2985	12	7.8
DL_040118_1_139	124.5	2.042	4.294	0.06	0.2982	0.003	0.56255	1691	11	1682	15	1699	21	1699	21	1
DL_040118_1_140	200	1.688	1.759	0.024	0.1718	0.0017	0.53715	1030.1	9.1	1021.7	9.3	1042	25	1042	25	1.9
DL_040118_1_141	272	1.022	1.97	0.025	0.1856	0.0019	0.70184	1104	8.6	1097	10	1112	20	1112	20	1.3
DL_040118_1_142	363	0.894	2.621	0.054	0.213	0.0043	0.81649	1303	15	1243	23	1409	23	1409	23	11.8
DL_040118_1_143	244	0.624	2.566	0.043	0.2057	0.0031	0.80009	1288	12	1205	17	1431	19	1431	19	15.8

## Sheet: Zabriskie6
Zabriske6 – Zabriskie Quartzite – 37.228711, -117.710296
Sample Name:								207/235		206/238		207/206		Best Age
Grain #	[U] ppm	U/Th	207/235	1σ error	206/238	1σ error	RHO	Age Ma	1σ error	Age Ma	1σ error	Age Ma	1σ error	(Ma)	1σ error	% Discordance*
Zabriskie6_1	132.2	1.048	6.058	0.053	0.3608	0.003	0.58218	1983.1	7.7	1986	14	1985	14	1985	14	0.1
Zabriskie6_2	186.2	1.373	5.404	0.049	0.3446	0.0027	0.53313	1884.3	7.7	1908	13	1865	14	1865	14	2.3
Zabriskie6_3	61.2	1.34	5.185	0.084	0.3306	0.0036	0.42091	1847	14	1841	17	1854	28	1854	28	0.7
Zabriskie6_4	155.7	0.646	5.014	0.046	0.3025	0.0024	0.57153	1820.7	7.8	1703	12	1958	15	1958	15	13
Zabriskie6_5	176.5	1.12	0.613	0.023	0.0775	0.0017	0.32875	484	14	481	10	489	78	481	10	0.6
Zabriskie6_6	40.4	0.728	12.67	0.26	0.5115	0.0088	0.66232	2653	19	2662	37	2658	28	2658	28	0.2
Zabriskie6_7	189.8	1.56	11.16	0.1	0.4819	0.0042	0.76824	2535.7	8.4	2535	18	2541	10	2541	10	0.2
Zabriskie6_8	68.7	1.238	4.954	0.076	0.3244	0.0042	0.55697	1813	13	1810	20	1815	26	1815	26	0.3
Zabriskie6_9	90.8	0.835	12.27	0.11	0.4978	0.0039	0.62949	2624.2	8.5	2603	17	2644	13	2644	13	1.6
Zabriskie6_10	62.8	0.907	4.959	0.061	0.322	0.0032	0.47368	1811	10	1799	16	1823	20	1823	20	1.3
Zabriskie6_11	279	0.73	0.803	0.038	0.0728	0.0014	0.1602	591	20	452.7	8.2	1180	110	DISC	DISC	23.4
Zabriskie6_12	68.9	0.858	4.922	0.072	0.3208	0.0037	0.56636	1806	13	1793	18	1826	23	1826	23	1.8
Zabriskie6_13	149.3	0.905	6.599	0.067	0.3771	0.0034	0.71621	2059	9.1	2062	16	2061	14	2061	14	0
Zabriskie6_14	55.7	0.831	5.462	0.095	0.3391	0.0042	0.54214	1892	15	1882	20	1913	27	1913	27	1.6
Zabriskie6_15	53.4	1.537	5.173	0.06	0.3314	0.003	0.42311	1846.5	9.9	1845	14	1856	21	1856	21	0.6
Zabriskie6_16	37.09	0.5858	12.52	0.13	0.5033	0.0057	0.65584	2642	10	2626	24	2657	15	2657	15	1.2
Zabriskie6_17	268.8	1.609	5.059	0.043	0.3297	0.0024	0.63087	1828.3	7.2	1837	12	1825	13	1825	13	0.7
Zabriskie6_18	25.23	0.4701	12.75	0.24	0.5084	0.0075	0.75095	2665	16	2647	32	2684	21	2684	21	1.4
Zabriskie6_19	124.5	0.813	12.86	0.14	0.512	0.005	0.75448	2668	10	2664	21	2676	12	2676	12	0.4
Zabriskie6_20	91.3	0.423	5.739	0.059	0.3512	0.0028	0.60844	1935.9	8.9	1942	14	1934	15	1934	15	0.4
Zabriskie6_21	177.8	1.157	5.587	0.047	0.3468	0.003	0.60905	1913.1	7.3	1919	14	1907	13	1907	13	0.6
Zabriskie6_22	120.6	1.688	4.302	0.042	0.2977	0.0027	0.44407	1692.9	8.1	1679	14	1709	16	1709	16	1.8
Zabriskie6_23	55.75	1.354	5.39	0.078	0.3454	0.004	0.74414	1882	12	1912	19	1857	19	1857	19	3
Zabriskie6_24	483	1.881	5.036	0.033	0.3324	0.0021	0.65997	1824.8	5.5	1851	10	1799.5	9.9	1799.5	9.9	2.9
Zabriskie6_25	190.2	1.332	11.696	0.094	0.5005	0.0036	0.78107	2580.3	7.3	2615	15	2557.7	8.7	2557.7	8.7	2.2
Zabriskie6_26	73.6	0.729	4.988	0.063	0.3251	0.0032	0.51034	1815	11	1814	15	1819	21
Zabriskie6_27	107.8	0.759	5.63	0.065	0.3469	0.003	0.64457	1919	10	1919	14	1922	17	1922	17	0.2
Zabriskie6_28	109.3	1.259	13.64	0.16	0.5326	0.006	0.81514	2723	11	2754	25	2705	12	2705	12	1.8
Zabriskie6_29	234.6	1.426	5.198	0.043	0.3345	0.0021	0.52225	1852.4	6.9	1860	10	1844	14	1844	14	0.9
Zabriskie6_30	249	1.128	5.077	0.051	0.3259	0.003	0.58028	1832.1	8.3	1818	14	1847	15	1847	15	1.6
Zabriskie6_31	193	1.849	5.91	0.2	0.3303	0.0036	0.32792	1953	29	1839	18	2071	56	2071	56	11.2
Zabriskie6_32	239.3	2.47	5.153	0.04	0.3354	0.0025	0.68983	1845	6.4	1864	12	1825.6	9.6	1825.6	9.6	2.1
Zabriskie6_33	55	1.213	5.109	0.07	0.3294	0.0036	0.5351	1837	11	1837	18	1835	22	1835	22	0.1
Zabriskie6_34	127.6	1.399	10.82	0.18	0.4704	0.0083	0.61297	2506	15	2484	36	2525	24	2525	24	1.6
Zabriskie6_35	117.8	1.435	5.11	0.049	0.3313	0.0027	0.64366	1837.8	8.4	1846	14	1835	16	1835	16	0.6
Zabriskie6_36	39.2	1.222	13.62	0.18	0.5292	0.0062	0.71084	2721	13	2736	26	2716	15	2716	15	0.7
Zabriskie6_37	68.1	1.083	5.045	0.059	0.3296	0.0031	0.56081	1825.2	9.9	1836	15	1816	18	1816	18	1.1
Zabriskie6_38	58.6	1.229	5.156	0.074	0.3332	0.0031	0.65602	1846	12	1853	15	1841	20	1841	20	0.7
Zabriskie6_39	38.74	1.401	11.7	0.14	0.4949	0.0056	0.61218	2579	11	2590	24	2571	16	2571	16	0.7
Zabriskie6_40	97.4	1.033	4.998	0.054	0.3216	0.0027	0.61484	1818.7	9	1799	13	1846	16	1846	16	2.5
Zabriskie6_41	69.9	1.024	5.641	0.066	0.3497	0.0033	0.57521	1920	10	1932	16	1908	17	1908	17	1.3
Zabriskie6_42	102.2	0.847	5.504	0.069	0.3417	0.004	0.61734	1902	10	1894	19	1903	19	1903	19	0.5
Zabriskie6_43	248.9	1.095	6.901	0.066	0.3842	0.0043	0.62333	2097.9	8.5	2095	20	2086	15	2086	15	0.4
Zabriskie6_44	161.7	0.3851	12.905	0.093	0.5195	0.0043	0.73934	2671.9	6.8	2696	18	2651	10	2651	10	1.7
Zabriskie6_45	93.9	1.351	4.787	0.066	0.3024	0.0034	0.63534	1780	12	1703	17	1870	19	1870	19	8.9
Zabriskie6_46	96.3	1.323	6.84	0.12	0.3837	0.0061	0.76531	2088	17	2092	29	2081	20	2081	20	0.5
Zabriskie6_47	136.3	0.7323	13.25	0.13	0.5282	0.0046	0.69152	2696	9.7	2733	19	2670	12	2670	12	2.4
Zabriskie6_48	77.7	0.1617	1.798	0.035	0.1738	0.0019	0.35883	1044	12	1033	11	1046	40	1046	40	1.2
Zabriskie6_49	798	1.703	4.487	0.08	0.2569	0.0044	0.80929	1726	15	1473	22	2048	18	2048	18	28.1
Zabriskie6_50	55.9	0.554	12.59	0.19	0.512	0.0076	0.73996	2646	14	2662	32	2634	18	2634	18	1.1
Zabriskie6_51	68.8	0.695	5.024	0.064	0.325	0.0037	0.61613	1823	11	1813	18	1832	18	1832	18	1
Zabriskie6_52	155.5	0.725	8.791	0.077	0.4368	0.0037	0.66457	2315.5	8	2338	16	2299	13	2299	13	1.7
Zabriskie6_53	76.1	0.4271	5.403	0.076	0.3376	0.0036	0.68	1883	12	1875	17	1891	19	1891	19	0.8
Zabriskie6_54	91.1	1.369	5.159	0.066	0.3325	0.0029	0.53922	1844	11	1850	14	1843	20	1843	20	0.4
Zabriskie6_55	30.9	0.514	13.17	0.2	0.5147	0.0068	0.59234	2690	14	2675	29	2700	21	2700	21	0.9
Zabriskie6_56	111.3	0.861	5.023	0.057	0.3202	0.0034	0.63081	1821.5	9.6	1790	17	1855	18	1855	18	3.5
Zabriskie6_57	99.9	1.212	6.621	0.073	0.3739	0.0037	0.50841	2060.8	9.7	2047	17	2072	19	2072	19	1.2
Zabriskie6_58	99	0.978	4.968	0.056	0.3246	0.0028	0.51459	1812.4	9.5	1812	14	1813	19	1813	19	0.1
Zabriskie6_59	40.7	0.498	5.45	0.1	0.3353	0.0045	0.47214	1891	15	1863	22	1913	31	1913	31	2.6
Zabriskie6_60	55.2	1.091	5.485	0.086	0.3419	0.0038	0.54825	1897	14	1895	18	1895	24	1895	24	0
Zabriskie6_61	88	0.792	5.82	0.088	0.3456	0.0043	0.76046	1946	13	1916	21	1967	19	1967	19	2.6
Zabriskie6_62	156.2	1.366	4.908	0.046	0.3216	0.0026	0.59252	1802.6	8	1797	12	1809	14	1809	14	0.7
Zabriskie6_63	128.4	1.611	6.637	0.064	0.3765	0.0031	0.6287	2064	8.8	2059	14	2066	14	2066	14	0.3
Zabriskie6_64	107.1	0.578	5.201	0.057	0.3321	0.0031	0.5948	1851.2	9.4	1848	15	1851	17	1851	17	0.2
Zabriskie6_65	152.3	1.108	5.081	0.044	0.3296	0.0025	0.65147	1832	7.3	1836	12	1827	14	1827	14	0.5
Zabriskie6_66	132.1	1.444	5.054	0.087	0.3257	0.0054	0.63356	1827	15	1817	26	1833	23	1833	23	0.9
Zabriskie6_67	162.2	2.091	4.221	0.047	0.2932	0.0027	0.64703	1676.7	9.2	1657	13	1700	17	1700	17	2.5
Zabriskie6_68	259.7	1.515	6.53	0.077	0.3652	0.0047	0.67579	2049	10	2006	22	2088	18	2088	18	3.9
Zabriskie6_69	130.5	2.152	5.213	0.047	0.3283	0.0027	0.50489	1853.7	7.8	1830	13	1878	16	1878	16	2.6
Zabriskie6_70	211	1.848	11.994	0.08	0.4998	0.0033	0.62957	2603.2	6.3	2612	14	2591.7	9.8	2591.7	9.8	0.8
Zabriskie6_71	548	2.256	4.82	0.12	0.3078	0.0072	0.68527	1785	21	1729	36	1839	28	1839	28	6
Zabriskie6_72	282.8	0.8045	5.591	0.051	0.3407	0.0029	0.66446	1913.9	7.9	1890	14	1935	13	1935	13	2.3
Zabriskie6_73	181.1	0.912	5.232	0.046	0.3325	0.0027	0.55523	1856.9	7.4	1850	13	1855	15	1855	15	0.3
Zabriskie6_74	175	1.012	5.07	0.045	0.327	0.0027	0.54145	1831.2	7.8	1823	13	1838	16	1838	16	0.8
Zabriskie6_75	175.8	0.7879	5.596	0.055	0.3458	0.0028	0.58375	1914.2	8.5	1914	14	1909	15	1909	15	0.3
Zabriskie6_76	324.2	0.83	9.42	0.13	0.3804	0.0047	0.76488	2379	12	2078	22	2640	14	2640	14	21.3
Zabriskie6_77	406.6	1.809	6.142	0.056	0.3629	0.0029	0.55216	1997.2	8	1997	13	1992	14	1992	14	0.3
Zabriskie6_78	121.3	1.023	4.946	0.05	0.3175	0.0027	0.61655	1808.9	8.5	1777	13	1848	15	1848	15	3.8
Zabriskie6_79	81.3	0.814	5.169	0.061	0.3275	0.0034	0.69091	1846	10	1826	17	1868	16	1868	16	2.2
Zabriskie6_80	45.7	0.5943	5.537	0.071	0.3416	0.0036	0.36747	1904	11	1894	17	1917	23	1917	23	1.2
Zabriskie6_81	151	0.571	5.833	0.074	0.3531	0.0043	0.77183	1949	11	1951	20	1947	16	1947	16	0.2
Zabriskie6_82	148	1.476	4.637	0.059	0.3103	0.0031	0.67772	1754	11	1742	15	1767	18	1767	18	1.4
Zabriskie6_83	61.8	0.88	4.744	0.066	0.3161	0.0033	0.57901	1773	12	1770	16	1770	21	1770	21	0
Zabriskie6_84	229.5	1.136	6.715	0.051	0.3813	0.003	0.72546	2074.8	7	2082	14	2062	11	2062	11	1
Zabriskie6_85	75.3	1.333	4.771	0.07	0.3076	0.0037	0.69469	1777	12	1728	18	1831	19	1831	19	5.6
Zabriskie6_86	171.2	1.128	12.2	0.087	0.4989	0.0036	0.73817	2620	6.9	2608	16	2622.7	9	2622.7	9	0.6
Zabriskie6_87	46.4	0.4246	5.485	0.068	0.3371	0.0037	0.49583	1896	11	1872	18	1918	21	1918	21	2.4
Zabriskie6_88	64.8	1.217	4.927	0.061	0.3208	0.003	0.56426	1805	10	1793	15	1819	19	1819	19	1.4
Zabriskie6_89	81.1	0.686	6.758	0.068	0.377	0.0032	0.5565	2080.2	8.6	2062	15	2096	16	2096	16	1.6
Zabriskie6_90	39.8	0.997	5.456	0.072	0.3359	0.0038	0.57567	1891	11	1866	18	1918	20	1918	20	2.7
Zabriskie6_91	36.1	0.554	12.97	0.17	0.509	0.0064	0.7013	2675	12	2650	28	2691	16	2691	16	1.5
Zabriskie6_92	47.6	1.238	5.091	0.077	0.3263	0.0035	0.62813	1832	13	1820	17	1843	21	1843	21	1.2
Zabriskie6_93	45.2	0.823	5.037	0.065	0.3234	0.0034	0.4523	1823	11	1806	17	1839	23	1839	23	1.8
Zabriskie6_94	87.8	0.944	13.54	0.13	0.525	0.0043	0.65448	2717	8.7	2720	18	2714	12	2714	12	0.2
Zabriskie6_95	134.9	1.82	5.02	0.044	0.325	0.0029	0.62317	1821.8	7.5	1813	14	1824	15	1824	15	0.6
Zabriskie6_96	87.2	0.902	12.59	0.11	0.5007	0.0041	0.63522	2648.3	8.4	2618	18	2668	12	2668	12	1.9
Zabriskie6_97	222.4	1.438	4.971	0.049	0.3196	0.0029	0.6496	1813.2	8.4	1787	14	1838	15	1838	15	2.8
Zabriskie6_98	97.9	0.921	4.982	0.052	0.3207	0.0025	0.52719	1815	8.8	1793	12	1834	17	1834	17	2.2
Zabriskie6_99	179.2	1.098	11.07	0.12	0.4681	0.0047	0.72607	2528	10	2474	21	2570	12	2570	12	3.7
Zabriskie6_100	52.2	1.016	5.35	0.13	0.3345	0.0047	0.32273	1871	19	1859	23	1873	33	1873	33	0.7
Zabriskie6_101	73.4	1.024	5.958	0.066	0.3528	0.0029	0.63647	1968.1	9.7	1947	14	1988	17	1988	17	2.1
Zabriskie6_102	167.7	1.07	6.454	0.055	0.3709	0.003	0.67911	2038.6	7.5	2033	14	2038	13	2038	13	0.2
Zabriskie6_103	61.6	1.365	4.879	0.058	0.3162	0.0029	0.61518	1797	10	1771	14	1826	17	1826	17	3
Zabriskie6_104	240.1	1.308	3.497	0.048	0.2269	0.0028	0.83611	1525	11	1318	15	1824	13	1824	13	27.7
Zabriskie6_105	88.2	0.968	4.948	0.058	0.3237	0.0029	0.58336	1810	9.7	1807	14	1809	18	1809	18	0.1
Zabriskie6_106	142.1	1.364	10.837	0.072	0.4724	0.0032	0.67528	2508.6	6.2	2493	14	2517	10	2517	10	1
Zabriskie6_107	158.4	1.638	5.125	0.049	0.315	0.0029	0.59893	1841.3	8.1	1767	13	1918	15	1918	15	7.9
Zabriskie6_108	52.9	0.4596	4.975	0.068	0.3148	0.0038	0.57306	1813	11	1763	19	1867	23	1867	23	5.6
Zabriskie6_109	64.9	0.5609	5.167	0.082	0.3221	0.0035	0.60019	1847	13	1799	17	1902	25	1902	25	5.4
Zabriskie6_110	189.9	0.85	5.051	0.052	0.3246	0.0031	0.5881	1826.6	8.8	1812	15	1841	16	1841	16	1.6
Zabriskie6_111	109.2	0.872	5.426	0.05	0.3351	0.0026	0.61161	1889.9	8.2	1863	13	1916	15	1916	15	2.8
Zabriskie6_112	146.6	1.603	5.014	0.043	0.3224	0.0027	0.63758	1821.8	7	1801	13	1840	13	1840	13	2.1
Zabriskie6_113	99.6	1.394	4.944	0.059	0.3219	0.0035	0.54296	1808	10	1798	17	1810	20	1810	20	0.7
Zabriskie6_114	300.4	0.54	5.115	0.083	0.3111	0.0042	0.767	1835	14	1745	21	1933	19	1933	19	9.7
Zabriskie6_115	227.7	1.6	4.073	0.044	0.2892	0.0027	0.733	1648.7	8.6	1637	14	1659	13	1659	13	1.3
Zabriskie6_116	107	1.19	6.539	0.073	0.3704	0.0037	0.545	2049.9	9.8	2031	18	2068	18	2068	18	1.8
Zabriskie6_117	190.6	1.27	5.013	0.05	0.3247	0.0029	0.689	1820.2	8.5	1812	14	1828	14	1828	14	0.9
Zabriskie6_118	93.7	0.69	19.04	0.18	0.5988	0.0059	0.647	3042.5	9.1	3023	24	3051	13	3051	13	0.9
Zabriskie6_119	70.2	0.71	4.978	0.072	0.3211	0.0038	0.514	1814	12	1794	19	1832	23	1832	23	2.1
Zabriskie6_120	165	0.69	5.591	0.058	0.3441	0.0034	0.582	1914.5	8.7	1906	16	1916	16	1916	16	0.5
Zabriskie6_121	69.7	0.51	1.699	0.043	0.1567	0.0033	0.546	1006	16	938	18	1151	46	1151	46	18.5
Zabriskie6_122	132.9	1.79	5.044	0.06	0.3289	0.0033	0.555	1826.3	9.9	1832	16	1816	19	1816	19	0.9
Zabriskie6_123	48.2	0.62	13.86	0.17	0.5241	0.0053	0.726	2738	12	2715	22	2752	14	2752	14	1.3
Zabriskie6_124	46.9	1.21	5.149	0.075	0.3285	0.0034	0.475	1842	12	1830	17	1854	23	1854	23	1.3
Zabriskie6_125	55.3	0.68	5.44	0.11	0.3404	0.0055	0.329	1890	16	1888	27	1888	39	1888	39	0
Zabriskie6_126	100.7	0.68	9.71	0.15	0.436	0.0056	0.71	2405	14	2332	25	2465	18	2465	18	5.4
Zabriskie6_127	104.8	0.83	9.81	0.25	0.442	0.011	0.826	2414	23	2358	47	2460	25	2460	25	4.1
Zabriskie6_128	258.1	1.59	5.181	0.051	0.3299	0.0032	0.601	1848.4	8.4	1837	16	1862	15	1862	15	1.3
Zabriskie6_129	24.81	3.45	13.33	0.21	0.5233	0.008	0.697	2700	15	2714	35	2692	21	2692	21	0.8
Zabriskie6_130	96.8	0.53	11.49	0.19	0.4853	0.0074	0.81	2562	16	2549	32	2569	20	2569	20	0.8
Zabriskie6_131	73.2	0.96	5.139	0.063	0.3285	0.0029	0.492	1841	10	1830	14	1849	21	1849	21	1
Zabriskie6_132	115.8	0.41	0.619	0.014	0.07722	0.0009	0.108	487.9	8.6	479.4	5.4	509	51	479.4	5.4	1.7
Zabriskie6_133	45.9	0.76	4.984	0.068	0.3205	0.003	0.445	1814	11	1791	15	1839	24	1839	24	2.6
Zabriskie6_134	72.9	1.29	4.984	0.083	0.3123	0.0039	0.664	1813	14	1751	19	1881	22	1881	22	6.9
Zabriskie6_135	101.9	1.46	4.846	0.054	0.3179	0.003	0.513	1791.4	9.5	1779	14	1799	18	1799	18	1.1
Zabriskie6_136	54.4	0.66	5.183	0.069	0.3313	0.0031	0.447	1848	11	1844	15	1847	23	1847	23	0.2
Zabriskie6_137	38.4	0.8	5.054	0.081	0.3276	0.0037	0.465	1829	14	1828	18	1822	29	1822	29	0.3
Zabriskie6_138	102.7	0.74	11.89	0.1	0.4938	0.0039	0.554	2598.1	7.9	2586	17	2596	13	2596	13	0.4
Zabriskie6_139	123	1.23	5.028	0.066	0.3242	0.0037	0.595	1823	11	1810	18	1834	20	1834	20	1.3
Zabriskie6_140	59	0.84	6.58	0.16	0.3729	0.0071	0.794	2058	20	2042	33	2071	30	2071	30	1.4
Zabriskie6_141	58.3	0.57	6.545	0.069	0.3681	0.0035	0.43	2053	9.8	2020	17	2080	19	2080	19	2.9

## Sheet: PH-7-11-13-1
PH-7-11-13-1 - Wyman Fm. - N37°10'06.54" W118°11'39.70"
Sample Name:								207/235		206/238		207/206		Best Age
Grain #	[U] ppm	U/Th	207/235	1σ error	206/238	1σ error	RHO	Age Ma	1σ error	Age Ma	1σ error	Age Ma	1σ error	(Ma)	1σ error	% Discordance*
PH-7-11-13-1-001		3.37	4.78814	0.04492	0.33301	0.00212	0.9	1783	8	1853	10	1705	9	1705	9	9.8
PH-7-11-13-1-002		0.95	17.6153	0.17661	0.55077	0.00439	0.9	2969	10	2828	18	3068	7	3068	7	-9.8
PH-7-11-13-1-003		2.34	4.81827	0.04988	0.33427	0.00223	0.9	1788	9	1859	11	1709	10	1709	10	10
PH-7-11-13-1-004		4.67	5.09896	0.04622	0.35696	0.00224	0.9	1836	8	1968	11	1692	8	1692	8	18.8
PH-7-11-13-1-005		3.46	4.65405	0.0538	0.32883	0.00231	0.9	1759	10	1833	11	1675	11	1675	11	10.7
PH-7-11-13-1-006		3.22	5.04753	0.04795	0.35097	0.00225	0.9	1827	8	1939	11	1704	9	1704	9	15.8
PH-7-11-13-1-007		4.24	4.64117	0.06105	0.32468	0.00246	0.9	1757	11	1813	12	1693	13	1693	13	8
PH-7-11-13-1-008		3.2	1.94098	0.04919	0.18982	0.00189	0.9	1095	17	1120	10	1048	35	1048	35	7.4
PH-7-11-13-1-009		2.41	5.40659	0.14125	0.35174	0.00463	0.9	1886	22	1943	22	1825	29	1825	29	7.3
PH-7-11-13-1-010		2.66	4.61783	0.04495	0.32311	0.00208	0.9	1752	8	1805	10	1692	9	1692	9	7.6
PH-7-11-13-1-011		3.75	3.03413	0.05063	0.2308	0.00192	0.9	1416	13	1339	10	1537	19	1537	19	-14.3
PH-7-11-13-1-012		2.04	9.47371	0.13529	0.44967	0.00416	0.9	2385	13	2394	18	2379	13	2379	13	0.7
PH-7-11-13-1-013		1.38	4.47104	0.05495	0.30024	0.00218	0.9	1726	10	1692	11	1767	12	1767	12	-4.9
PH-7-11-13-1-014		2.33	8.60013	0.10533	0.43399	0.0035	0.9	2297	11	2324	16	2274	11	2274	11	2.5
PH-7-11-13-1-015		2	4.93548	0.0721	0.33694	0.00274	0.9	1808	12	1872	13	1737	15	1737	15	8.9
PH-7-11-13-1-016		1.7	11.3093	0.15932	0.47494	0.00449	0.9	2549	13	2505	20	2585	12	2585	12	-3.8
PH-7-11-13-1-017		2.73	2.9236	0.06512	0.24912	0.00246	0.9	1388	17	1434	13	1319	28	1319	28	9.7
PH-7-11-13-1-018		2.02	5.09507	0.09339	0.35634	0.00344	0.9	1835	16	1965	16	1692	20	1692	20	18.7
PH-7-11-13-1-019		2.76	4.74822	0.06158	0.32497	0.00243	0.9	1776	11	1814	12	1732	13	1732	13	5.4
PH-7-11-13-1-020		50.43	4.38197	0.06524	0.30504	0.00247	0.9	1709	12	1716	12	1700	16	1700	16	1
PH-7-11-13-1-021		1.87	13.793	0.12981	0.56479	0.00407	0.9	2736	9	2886	17	2626	7	2626	7	12.3
PH-7-11-13-1-022		1.28	1.06149	0.0366	0.11909	0.00132	0.9	735	18	725	8	763	54	725	8	-5.2
PH-7-11-13-1-023		2.2	10.5671	0.12698	0.49034	0.00403	0.9	2486	11	2572	17	2416	10	2416	10	7.8
PH-7-11-13-1-024		2.59	5.00512	0.05879	0.34221	0.00242	0.9	1820	10	1897	12	1733	12	1733	12	10.9
PH-7-11-13-1-025		5.15	4.78827	0.09852	0.32645	0.00342	0.9	1783	17	1821	17	1738	23	1738	23	5.5
PH-7-11-13-1-026		2.74	3.2399	0.0975	0.26444	0.00323	0.9	1467	23	1513	16	1401	39	1401	39	9
PH-7-11-13-1-027		4.59	3.2296	0.05382	0.26322	0.00214	0.9	1464	13	1506	11	1404	20	1404	20	8.2
PH-7-11-13-1-028		1.25	4.80174	0.15951	0.31909	0.00485	0.9	1785	28	1785	24	1785	38	1785	38	0.1
PH-7-11-13-1-029		0.88	4.50522	0.08235	0.30527	0.00285	0.9	1732	15	1717	14	1749	20	1749	20	-2
PH-7-11-13-1-030		2.09	4.78198	0.08227	0.32443	0.00295	0.9	1782	14	1811	14	1747	18	1747	18	4.3
PH-7-11-13-1-031		1.45	14.3632	0.16901	0.56494	0.0048	0.9	2774	11	2887	20	2692	9	2692	9	9
PH-7-11-13-1-032		2.48	4.89948	0.06101	0.32934	0.00241	0.9	1802	11	1835	12	1764	12	1764	12	4.7
PH-7-11-13-1-033		2.17	11.8842	0.13558	0.51508	0.00414	0.9	2595	11	2678	18	2530	9	2530	9	7.2
PH-7-11-13-1-034		1.15	5.69771	0.08796	0.36882	0.0032	0.9	1931	13	2024	15	1832	16	1832	16	12.3
PH-7-11-13-1-035		0.63	11.6935	0.13217	0.51113	0.00407	0.9	2580	11	2661	17	2516	9	2516	9	7.1
PH-7-11-13-1-036		1.68	16.6201	0.22586	0.60164	0.00595	0.9	2913	13	3036	24	2828	11	2828	11	9.3
PH-7-11-13-1-037		3.43	13.5564	0.13637	0.5467	0.0041	0.9	2719	10	2811	17	2650	8	2650	8	7.6
PH-7-11-13-1-038		1.63	5.08981	0.13201	0.33681	0.0043	0.9	1834	22	1871	21	1792	29	1792	29	5.2
PH-7-11-13-1-039		2.16	16.0172	0.15084	0.56124	0.00412	0.9	2878	9	2872	17	2881	7	2881	7	-0.3
PH-7-11-13-1-040		3.36	5.01041	0.0651	0.34335	0.00258	0.9	1821	11	1903	12	1728	13	1728	13	11.8
PH-7-11-13-1-041		2.67	22.1234	0.31645	0.66968	0.00734	0.9	3189	14	3305	28	3116	11	3116	11	7.8
PH-7-11-13-1-042		6.35	4.33658	0.05951	0.31293	0.00237	0.9	1700	11	1755	12	1632	15	1632	15	8.7
PH-7-11-13-1-043		5.58	4.60892	0.07497	0.3276	0.00281	0.9	1751	14	1827	14	1660	18	1660	18	11.6
PH-7-11-13-1-044		1.82	4.78038	0.07955	0.32417	0.00287	0.9	1781	14	1810	14	1747	18	1747	18	4.2
PH-7-11-13-1-045		11.86	10.3067	0.10243	0.47827	0.0034	0.9	2463	9	2520	15	2415	8	2415	8	5.3
PH-7-11-13-1-046		2.22	4.86758	0.09357	0.3277	0.00324	0.9	1797	16	1827	16	1760	21	1760	21	4.5
PH-7-11-13-1-047		2.46	8.99307	0.21788	0.45363	0.00639	0.9	2337	22	2411	28	2272	23	2272	23	7.5
PH-7-11-13-1-048		2.18	17.1392	0.21522	0.58665	0.00547	0.9	2943	12	2976	22	2919	10	2919	10	2.5
PH-7-11-13-1-049		2.69	4.77614	0.05679	0.31196	0.0022	0.9	1781	10	1750	11	1815	12	1815	12	-4
PH-7-11-13-1-050		1.56	12.8079	0.21714	0.51981	0.00589	0.9	2666	16	2698	25	2639	14	2639	14	2.8
PH-7-11-13-1-051		2.28	5.22418	0.10208	0.34749	0.00353	0.9	1857	17	1923	17	1782	21	1782	21	9.3
PH-7-11-13-1-052		3.6	5.17711	0.0831	0.33641	0.00295	0.9	1849	14	1869	14	1824	17	1824	17	3
PH-7-11-13-1-053		2.63	8.82837	0.11447	0.44371	0.0037	0.9	2320	12	2367	17	2278	12	2278	12	4.8
PH-7-11-13-1-054		3.63	4.37234	0.06371	0.29618	0.00234	0.9	1707	12	1672	12	1748	15	1748	15	-4.8
PH-7-11-13-1-055		3.8	5.66887	0.12074	0.36479	0.00404	0.9	1927	18	2005	19	1842	23	1842	23	10.4
PH-7-11-13-1-056		2.03	9.29883	0.1013	0.37454	0.00283	0.9	2368	10	2051	13	2652	9	2652	9	-26.3
PH-7-11-13-1-057		1.22	16.0993	0.1944	0.58974	0.00522	0.9	2883	12	2988	21	2808	9	2808	9	8.2
PH-7-11-13-1-058		1.47	5.28815	0.11574	0.32506	0.00367	0.9	1867	19	1814	18	1924	23	1924	23	-6.4
PH-7-11-13-1-059		7.63	4.98198	0.05965	0.33262	0.00235	0.9	1816	10	1851	11	1775	12	1775	12	5.1
PH-7-11-13-1-060		1.07	12.9692	0.16044	0.52922	0.00459	0.9	2677	12	2738	19	2630	10	2630	10	5.2
PH-7-11-13-1-061		6.07	4.42489	0.07457	0.30539	0.00267	0.9	1717	14	1718	13	1714	18	1714	18	0.4
PH-7-11-13-1-062		3.94	4.77437	0.06454	0.32228	0.00244	0.9	1780	11	1801	12	1754	14	1754	14	3.2
PH-7-11-13-1-063		2.16	4.19125	0.06908	0.30096	0.00255	0.9	1672	14	1696	13	1641	18	1641	18	4
PH-7-11-13-1-064		5.91	3.55809	0.0596	0.26443	0.0021	0.87	1540	13	1512	11	1579	35	1579	35	-4.7

## Sheet: PH-7-16-13-3
PH-7-16-13-3 - Wyman Fm. - N37°26.258 W118°10.062
Sample Name:								207/235		206/238		207/206		Best Age
Grain #	[U] ppm	U/Th	207/235	1σ error	206/238	1σ error	RHO	Age Ma	1σ error	Age Ma	1σ error	Age Ma	1σ error	(Ma)	1σ error	% Discordance*
PH-7-16-13-3-001		2.04	7.85529	0.06056	0.40107	0.00239	0.9	2215	7	2174	11	2253	6	2253	6	-4.2
PH-7-16-13-3-002		6.6	4.24391	0.04004	0.29585	0.00183	0.9	1683	8	1671	9	1698	9	1698	9	-1.9
PH-7-16-13-3-003		2.7	4.07464	0.03944	0.28501	0.00177	0.9	1649	8	1617	9	1692	9	1692	9	-5.1
PH-7-16-13-3-004		4.53	4.26958	0.0365	0.29752	0.00176	0.9	1688	7	1679	9	1699	8	1699	8	-1.4
PH-7-16-13-3-005		2.25	4.63998	0.06295	0.30407	0.00234	0.9	1756	11	1711	12	1811	14	1811	14	-6.3
PH-7-16-13-3-006		2.89	4.11487	0.0584	0.28735	0.00222	0.9	1657	12	1628	11	1695	15	1695	15	-4.5
PH-7-16-13-3-007		3.62	3.73018	0.03467	0.26914	0.00163	0.9	1578	7	1536	8	1634	9	1634	9	-6.8
PH-7-16-13-3-008		1.63	3.7914	0.05524	0.27888	0.00216	0.9	1591	12	1586	11	1599	16	1599	16	-0.9
PH-7-16-13-3-009		2.02	4.29381	0.0419	0.30484	0.00191	0.9	1692	8	1715	9	1664	9	1664	9	3.4
PH-7-16-13-3-010		1.18	2.40477	0.05447	0.20968	0.002	0.9	1244	16	1227	11	1274	29	1274	29	-4.1
PH-7-16-13-3-011		4.05	1.88542	0.02955	0.18415	0.00132	0.9	1076	10	1090	7	1049	20	1049	20	4.1
PH-7-16-13-3-012		4.97	4.33254	0.04148	0.30054	0.00187	0.9	1700	8	1694	9	1707	9	1707	9	-0.9
PH-7-16-13-3-013		1.54	11.5454	0.09643	0.49306	0.00321	0.9	2568	8	2584	14	2557	6	2557	6	1.3
PH-7-16-13-3-014		2.79	2.84029	0.03894	0.23734	0.00168	0.9	1366	10	1373	9	1357	16	1357	16	1.3
PH-7-16-13-3-015		1.31	4.2967	0.07884	0.30207	0.0028	0.9	1693	15	1702	14	1683	20	1683	20	1.2
PH-7-16-13-3-016		1.29	4.47984	0.05222	0.31002	0.00215	0.9	1727	10	1741	11	1712	12	1712	12	1.9
PH-7-16-13-3-017		1.76	4.43327	0.04964	0.30705	0.00208	0.9	1719	9	1726	10	1710	11	1710	11	1
PH-7-16-13-3-018		1.27	10.7292	0.09179	0.48016	0.00314	0.9	2500	8	2528	14	2478	7	2478	7	2.4
PH-7-16-13-3-019		1.02	6.07029	0.10433	0.34297	0.00334	0.9	1986	15	1901	16	2076	17	2076	17	-9.8
PH-7-16-13-3-020		3.75	4.58884	0.05283	0.31582	0.00218	0.9	1747	10	1769	11	1722	11	1722	11	3.1
PH-7-16-13-3-021		1.4	4.84188	0.04338	0.32807	0.002	0.9	1792	8	1829	10	1750	8	1750	8	5.1
PH-7-16-13-3-022		1.3	4.43252	0.06112	0.31268	0.00239	0.9	1718	11	1754	12	1676	15	1676	15	5.2
PH-7-16-13-3-023		3.23	4.30627	0.04364	0.3029	0.00194	0.9	1695	8	1706	10	1682	10	1682	10	1.6
PH-7-16-13-3-024		1.2	2.92278	0.04796	0.24285	0.00192	0.9	1388	12	1401	10	1368	20	1368	20	2.7
PH-7-16-13-3-025		0.62	12.7721	0.10268	0.50145	0.00323	0.9	2663	8	2620	14	2696	6	2696	6	-3.5
PH-7-16-13-3-026		1.03	4.93128	0.12149	0.33284	0.00399	0.9	1808	21	1852	19	1757	28	1757	28	6.2
PH-7-16-13-3-027		0.81	9.95147	0.18795	0.45253	0.00532	0.9	2430	17	2406	24	2451	17	2451	17	-2.2
PH-7-16-13-3-028		1.32	4.5494	0.06054	0.31605	0.00238	0.9	1740	11	1770	12	1704	14	1704	14	4.4
PH-7-16-13-3-029		2.54	4.37168	0.04448	0.31009	0.00199	0.9	1707	8	1741	10	1666	10	1666	10	5.1
PH-7-16-13-3-030		2	1.84824	0.03403	0.17798	0.00139	0.9	1063	12	1056	8	1078	24	1078	24	-2.2
PH-7-16-13-3-031		1.52	2.91037	0.06756	0.23674	0.00241	0.9	1385	18	1370	13	1408	29	1408	29	-3.1
PH-7-16-13-3-032		1.82	2.32244	0.08656	0.20824	0.00298	0.9	1219	26	1219	16	1220	51	1220	51	.
PH-7-16-13-3-033		1.93	4.34021	0.05432	0.30842	0.00221	0.9	1701	10	1733	11	1663	13	1663	13	4.8
PH-7-16-13-3-034		7.46	4.01463	0.04948	0.29602	0.00208	0.9	1637	10	1672	10	1594	13	1594	13	5.5
PH-7-16-13-3-035		1.56	4.29765	0.07632	0.30779	0.00277	0.9	1693	15	1730	14	1648	20	1648	20	5.6
PH-7-16-13-3-036		1.35	4.76195	0.0912	0.32069	0.00319	0.9	1778	16	1793	16	1762	21	1762	21	2
PH-7-16-13-3-037		8.6	3.84932	0.0301	0.27655	0.00156	0.9	1603	6	1574	8	1642	7	1642	7	-4.7
PH-7-16-13-3-038		2.37	4.26268	0.14349	0.29495	0.00428	0.9	1686	28	1666	21	1712	41	1712	41	-3.1
PH-7-16-13-3-039		2.33	10.6227	0.07748	0.47954	0.00285	0.9	2491	7	2525	12	2463	6	2463	6	3
PH-7-16-13-3-040		0.88	2.81778	0.06873	0.23292	0.0024	0.9	1360	18	1350	13	1378	31	1378	31	-2.3
PH-7-16-13-3-041		2.14	12.3336	0.10497	0.51415	0.00341	0.9	2630	8	2674	15	2597	7	2597	7	3.6
PH-7-16-13-3-042		3.31	4.33459	0.07443	0.30376	0.00244	0.87	1700	14	1710	12	1688	36	1688	36	1.5
PH-7-16-13-3-043		1.62	3.40279	0.04066	0.23764	0.00163	0.9	1505	9	1374	8	1695	12	1695	12	-21
PH-7-16-13-3-044		3.81	1.86261	0.04137	0.18385	0.00166	0.9	1068	15	1088	9	1028	30	1028	30	6.3
PH-7-16-13-3-045		0.6	3.74782	0.105	0.27648	0.00343	0.9	1582	22	1574	17	1593	34	1593	34	-1.4
PH-7-16-13-3-046		2.37	2.80464	0.04845	0.24139	0.00197	0.9	1357	13	1394	10	1299	21	1299	21	8
PH-7-16-13-3-047		2.67	4.70129	0.04442	0.32134	0.002	0.9	1767	8	1796	10	1734	9	1734	9	4.1
PH-7-16-13-3-048		4	4.62741	0.04837	0.31842	0.00209	0.9	1754	9	1782	10	1722	10	1722	10	3.9
PH-7-16-13-3-049		3.39	8.53168	0.10101	0.42617	0.00334	0.9	2289	11	2288	15	2291	10	2291	10	-0.2
PH-7-16-13-3-050		4.46	4.88001	0.09059	0.33129	0.0032	0.9	1799	16	1845	15	1747	20	1747	20	6.4
PH-7-16-13-3-051		0.89	4.68678	0.11726	0.31506	0.00377	0.9	1765	21	1766	18	1765	28	1765	28	.
PH-7-16-13-3-052		4.12	12.2123	0.21095	0.50401	0.00575	0.9	2621	16	2631	25	2614	15	2614	15	0.8
PH-7-16-13-3-053		2.31	3.05793	0.05003	0.26242	0.00207	0.9	1422	13	1502	11	1305	20	1305	20	16.9
PH-7-16-13-3-054		1.48	0.93027	0.0303	0.10815	0.0011	0.9	668	16	662	6	688	52	662	6	-4
PH-7-16-13-3-055		2.48	4.68378	0.05482	0.32168	0.00225	0.9	1764	10	1798	11	1725	12	1725	12	4.8
PH-7-16-13-3-056		6.24	4.18091	0.08285	0.30341	0.00299	0.9	1670	16	1708	15	1624	22	1624	22	5.9
PH-7-16-13-3-057		1.15	4.51119	0.07089	0.31988	0.00269	0.9	1733	13	1789	13	1667	17	1667	17	8.4
PH-7-16-13-3-058		2.98	4.24575	0.07072	0.30899	0.00269	0.9	1683	14	1736	13	1618	18	1618	18	8.2
PH-7-16-13-3-059		1.91	3.63003	0.05816	0.27854	0.00227	0.9	1556	13	1584	11	1519	18	1519	18	4.8
PH-7-16-13-3-060		1.49	10.2497	0.19258	0.4689	0.00553	0.9	2458	17	2479	24	2441	17	2441	17	1.8
PH-7-16-13-3-061		0.81	10.0006	0.39627	0.45026	0.00776	0.91	2435	37	2396	34	2467	75	2467	75	-3.4
PH-7-16-13-3-062		1.69	4.70703	0.05812	0.32715	0.00236	0.9	1768	10	1825	11	1704	13	1704	13	8.1
PH-7-16-13-3-063		5.62	4.55582	0.06046	0.32154	0.00242	0.9	1741	11	1797	12	1675	14	1675	14	8.3
PH-7-16-13-3-064		1.21	8.11375	0.20512	0.36202	0.0041	0.89	2244	23	1992	19	2482	48	2482	48	-22.9
PH-7-16-13-3-065		3.65	4.60903	0.05898	0.31821	0.00235	0.9	1751	11	1781	11	1716	13	1716	13	4.3
PH-7-16-13-3-066		1.39	12.1946	0.20018	0.51809	0.00569	0.9	2619	15	2691	24	2565	14	2565	14	6
PH-7-16-13-3-067		3.97	12.1125	0.12087	0.50909	0.00375	0.9	2613	9	2653	16	2583	8	2583	8	3.2
PH-7-16-13-3-068		2.3	4.50292	0.04296	0.31524	0.00196	0.9	1732	8	1766	10	1690	9	1690	9	5.1
PH-7-16-13-3-069		3.24	4.46442	0.04447	0.31256	0.00199	0.9	1724	8	1753	10	1690	10	1690	10	4.2
PH-7-16-13-3-070		0.74	19.8529	0.21482	0.6121	0.00524	0.9	3084	10	3078	21	3089	8	3089	8	-0.5
PH-7-16-13-3-071		0.64	1.47842	0.03645	0.15765	0.00141	0.9	922	15	944	8	870	36	944	8	9.1
PH-7-16-13-3-072		1.91	3.62392	0.07002	0.27168	0.00218	0.88	1555	15	1549	11	1562	40	1562	40	-0.9
PH-7-16-13-3-073		2.89	3.11211	0.03541	0.22891	0.00136	0.88	1436	9	1329	7	1598	24	1598	24	-18.6
PH-7-16-13-3-074		2.05	2.68118	0.04021	0.22893	0.00169	0.9	1323	11	1329	9	1315	18	1315	18	1.1
PH-7-16-13-3-075		1.68	4.67222	0.04507	0.31473	0.00198	0.9	1762	8	1764	10	1761	9	1761	9	0.1
PH-7-16-13-3-076		2.94	4.395	0.10386	0.30599	0.00349	0.9	1711	20	1721	17	1700	27	1700	27	1.3
PH-7-16-13-3-077		1.64	5.51792	0.05387	0.33789	0.00219	0.9	1903	8	1877	11	1934	9	1934	9	-3.4
PH-7-16-13-3-078		2.19	11.2496	0.10239	0.47545	0.00303	0.9	2544	8	2507	13	2573	19	2573	19	-3.1
PH-7-16-13-3-079		1.7	4.1091	0.03962	0.28787	0.00179	0.9	1656	8	1631	9	1689	9	1689	9	-3.9
PH-7-16-13-3-080		2.38	5.7102	0.04708	0.34177	0.00204	0.9	1933	7	1895	10	1974	7	1974	7	-4.7
PH-7-16-13-3-081		2.63	4.30464	0.04586	0.29909	0.00196	0.9	1694	9	1687	10	1704	10	1704	10	-1.2
PH-7-16-13-3-082		2.98	2.80367	0.04035	0.23599	0.00171	0.9	1357	11	1366	9	1343	17	1343	17	1.9
PH-7-16-13-3-083		1.51	2.71042	0.03957	0.23	0.00168	0.9	1331	11	1334	9	1327	17	1327	17	0.6
PH-7-16-13-3-084		1.44	11.1283	0.08557	0.47818	0.00295	0.9	2534	7	2519	13	2546	6	2546	6	-1.3
PH-7-16-13-3-085		1.61	8.61216	0.09549	0.4141	0.00311	0.9	2298	10	2234	14	2356	9	2356	9	-6.2
PH-7-16-13-3-086		1.61	14.9722	0.20761	0.53144	0.00533	0.9	2813	13	2748	22	2862	11	2862	11	-4.9
PH-7-16-13-3-087		0.81	10.6647	0.08017	0.46413	0.00282	0.9	2494	7	2458	12	2525	6	2525	6	-3.2
PH-7-16-13-3-088		12.8	4.23485	0.03124	0.29381	0.00164	0.9	1681	6	1661	8	1707	6	1707	6	-3.1
PH-7-16-13-3-089		1	10.6922	0.16874	0.46623	0.00478	0.9	2497	15	2467	21	2522	14	2522	14	-2.6
PH-7-16-13-3-090		5.75	4.28709	0.03365	0.30323	0.00173	0.9	1691	6	1707	9	1671	7	1671	7	2.4
PH-7-16-13-3-091		1.18	4.21092	0.04116	0.29437	0.00184	0.9	1676	8	1663	9	1693	9	1693	9	-2
PH-7-16-13-3-092		2.84	4.25531	0.04966	0.30628	0.0021	0.9	1685	10	1722	10	1639	12	1639	12	5.7
PH-7-16-13-3-093		1.33	11.151	0.10088	0.46725	0.00319	0.9	2536	8	2471	14	2588	7	2588	7	-5.5
PH-7-16-13-3-094		0.91	11.8254	0.12493	0.49355	0.00378	0.9	2591	10	2586	16	2595	8	2595	8	-0.5
PH-7-16-13-3-095		2.55	13.7644	0.10495	0.51526	0.00306	0.9	2734	7	2679	13	2774	16	2774	16	-4.2
PH-7-16-13-3-096		2.52	9.09359	0.08183	0.43111	0.00285	0.9	2347	8	2311	13	2380	7	2380	7	-3.5
PH-7-16-13-3-097		1.99	3.08197	0.08172	0.24564	0.00284	0.9	1428	20	1416	15	1447	33	1447	33	-2.4
PH-7-16-13-3-098		3.05	4.21644	0.05277	0.2962	0.00212	0.9	1677	10	1672	11	1684	13	1684	13	-0.8
PH-7-16-13-3-099		1.14	3.92033	0.04077	0.28283	0.00181	0.9	1618	8	1606	9	1635	10	1635	10	-2
PH-7-16-13-3-100		2.34	2.41854	0.04035	0.21259	0.00164	0.9	1248	12	1243	9	1259	21	1259	21	-1.4

## Sheet: PH-7-16-13-2A-2B
PH-7-16-13-2A-2B - Harkless Fm. - N37°24.143 W118°13.548
Sample Name:								207/235		206/238		207/206		Best Age
Grain #	[U] ppm	U/Th	207/235	1σ error	206/238	1σ error	RHO	Age Ma	1σ error	Age Ma	1σ error	Age Ma	1σ error	(Ma)	1σ error	% Discordance*
PH-7-16-13-2A-2B-001		0.91	4.5089	0.05461	0.31329	0.00222	0.9	1733	10	1757	11	1704	12	1704	12	3.5
PH-7-16-13-2A-2B-002		1.17	4.12856	0.04257	0.28269	0.00182	0.9	1660	8	1605	9	1731	10	1731	10	-8.3
PH-7-16-13-2A-2B-003		1.8	4.3702	0.03646	0.30652	0.00179	0.9	1707	7	1724	9	1687	8	1687	8	2.4
PH-7-16-13-2A-2B-004		1.26	4.23704	0.03155	0.29801	0.00166	0.9	1681	6	1681	8	1682	6	1682	6	-0.1
PH-7-16-13-2A-2B-005		1.08	4.25214	0.03931	0.29886	0.00182	0.9	1684	8	1686	9	1683	9	1683	9	0.1
PH-7-16-13-2A-2B-006		1.68	4.16008	0.0363	0.29486	0.00175	0.9	1666	7	1666	9	1668	8	1668	8	-0.2
PH-7-16-13-2A-2B-007		0.34	14.5359	0.12849	0.54009	0.00377	0.9	2785	8	2784	16	2787	7	2787	7	-0.2
PH-7-16-13-2A-2B-008		1.39	11.2186	0.08649	0.47686	0.00295	0.9	2541	7	2514	13	2564	6	2564	6	-2.4
PH-7-16-13-2A-2B-009		2.13	4.54133	0.04752	0.31676	0.00207	0.9	1739	9	1774	10	1697	10	1697	10	5.1
PH-7-16-13-2A-2B-010		2.51	4.27069	0.0346	0.29986	0.00173	0.9	1688	7	1691	9	1685	7	1685	7	0.4
PH-7-16-13-2A-2B-011		2.18	2.81971	0.03531	0.23583	0.00159	0.9	1361	9	1365	8	1355	14	1355	14	0.8
PH-7-16-13-2A-2B-012		1.95	4.25193	0.05439	0.3007	0.00219	0.9	1684	11	1695	11	1672	13	1672	13	1.5
PH-7-16-13-2A-2B-013		1.58	4.40227	0.05558	0.30436	0.0022	0.9	1713	10	1713	11	1713	13	1713	13	-0.1
PH-7-16-13-2A-2B-014		2.64	4.31023	0.04483	0.30435	0.00197	0.9	1695	9	1713	10	1675	10	1675	10	2.6
PH-7-16-13-2A-2B-015		1.54	4.00839	0.03898	0.28061	0.00175	0.9	1636	8	1594	9	1690	9	1690	9	-6.4
PH-7-16-13-2A-2B-016		5.88	4.30655	0.03142	0.30472	0.00169	0.9	1695	6	1715	8	1671	6	1671	6	3
PH-7-16-13-2A-2B-017		0.69	2.75434	0.05251	0.22827	0.00196	0.9	1343	14	1325	10	1373	23	1373	23	-3.8
PH-7-16-13-2A-2B-018		0.79	4.19134	0.03895	0.29114	0.00178	0.9	1672	8	1647	9	1705	9	1705	9	-3.9
PH-7-16-13-2A-2B-019		2.2	4.36901	0.03399	0.3047	0.00173	0.9	1706	6	1715	9	1697	7	1697	7	1.1
PH-7-16-13-2A-2B-020		1.93	4.33294	0.03527	0.3008	0.00174	0.9	1700	7	1695	9	1706	7	1706	7	-0.7
PH-7-16-13-2A-2B-021		3.55	4.47858	0.04107	0.31229	0.00191	0.9	1727	8	1752	9	1698	9	1698	9	3.6
PH-7-16-13-2A-2B-022		1.55	11.8605	0.10176	0.48644	0.00324	0.9	2593	8	2555	14	2624	7	2624	7	-3.2
PH-7-16-13-2A-2B-023		2.58	4.19445	0.03327	0.29508	0.00169	0.9	1673	7	1667	8	1681	7	1681	7	-1
PH-7-16-13-2A-2B-024		2.82	4.36483	0.03739	0.30995	0.00183	0.9	1706	7	1740	9	1664	8	1664	8	5.2
PH-7-16-13-2A-2B-025		3.65	4.46833	0.04003	0.31129	0.00188	0.9	1725	7	1747	9	1699	8	1699	8	3.2
PH-7-16-13-2A-2B-026		2.38	4.53021	0.04141	0.32226	0.00196	0.9	1737	8	1801	10	1661	9	1661	9	9.6
PH-7-16-13-2A-2B-027		3.5	4.5589	0.04701	0.31308	0.00204	0.9	1742	9	1756	10	1726	10	1726	10	2
PH-7-16-13-2A-2B-028		4.02	4.4388	0.04081	0.30681	0.00188	0.9	1720	8	1725	9	1714	9	1714	9	0.7
PH-7-16-13-2A-2B-029		4.59	3.41771	0.03665	0.26485	0.00169	0.9	1508	8	1515	9	1501	11	1501	11	1
PH-7-16-13-2A-2B-030		2.72	4.15413	0.04601	0.29652	0.00198	0.9	1665	9	1674	10	1654	11	1654	11	1.3
PH-7-16-13-2A-2B-031		1.22	4.41449	0.04295	0.30499	0.00192	0.9	1715	8	1716	9	1715	9	1715	9
PH-7-16-13-2A-2B-032		27.75	4.3455	0.03526	0.3024	0.00175	0.9	1702	7	1703	9	1701	7	1701	7	0.1
